# Supplementary material for: Single-molecule RNA sizing enables quantitative analysis of alternative transcription termination
Source: Springer Nature journal article supplement (doi:10.1038/s41467-024-45968-8), 2024-02-24
Supplement: MOESM1 [file 41467_2024_45968_MOESM1_ESM.pdf]

Supplementary Material for

## Single-Molecule RNA Sizing Enables Quantitative Analysis of Alternative Transcription Termination

Patiño-Guillén, G., Pešović, J., Panić, M., Savić-Pavićević, D., Bošković, F.\*, Keyser, U.F.\*

Correspondence to: [fnb24@cam.ac.uk](mailto:fnb24@cam.ac.uk) , [ufk20@cam.ac.uk](mailto:ufk20@cam.ac.uk)

This PDF file includes:

- Supplementary Figures 1 to 29
- Supplementary Tables 1 to 8

## Supplementary Figure 1.

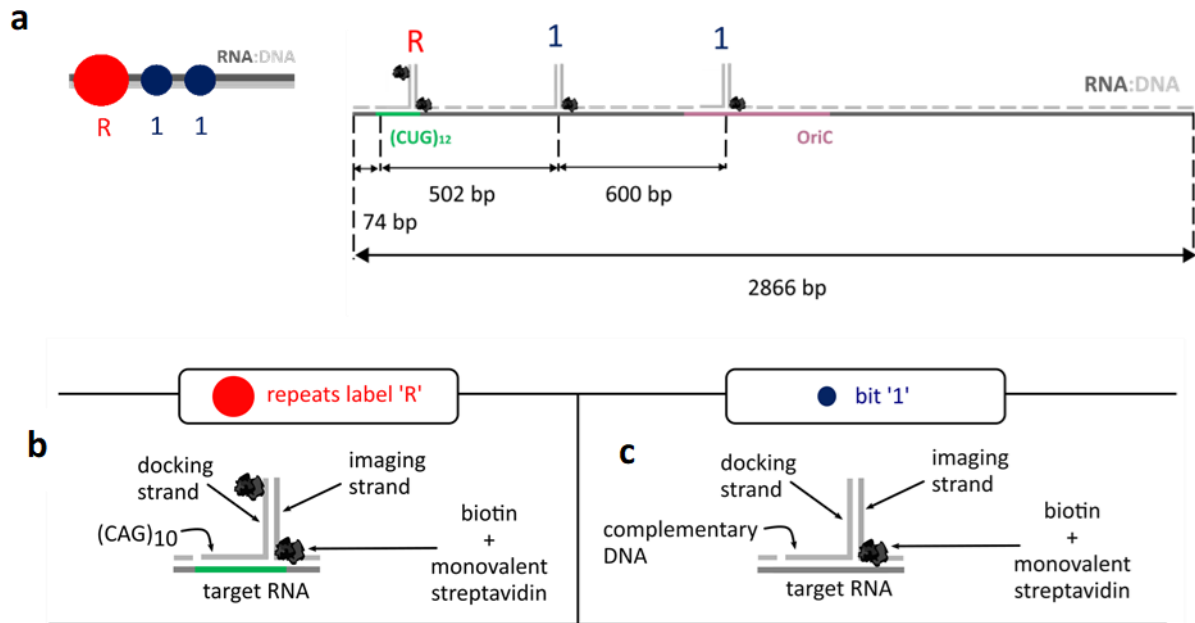

**Supplementary Figure 1.** Design of RNA ID. **a** The position of the repeats label 'R' and the '1' bits within the RNA ID is shown. **b** 'R' represents a DNA CAG<sub>10</sub> oligonucleotide (docking strand) that binds to the CUG repeats, this oligo has an overhang sequence with 3' biotin that binds to a complementary strand (imaging strand) with another 3' biotin, enabling the overall binding of two monovalent streptavidins to RNA ID. **c** The RNA ID is decorated with '1'. Two '1' bits are included in the RNA ID design to produce a distinguishable signal. '1' bits lack biotin on the docking strand, which enables the binding of only one monovalent streptavidin per bit, providing a discriminatory signal in nanopore recordings.

## Supplementary Figure 2.

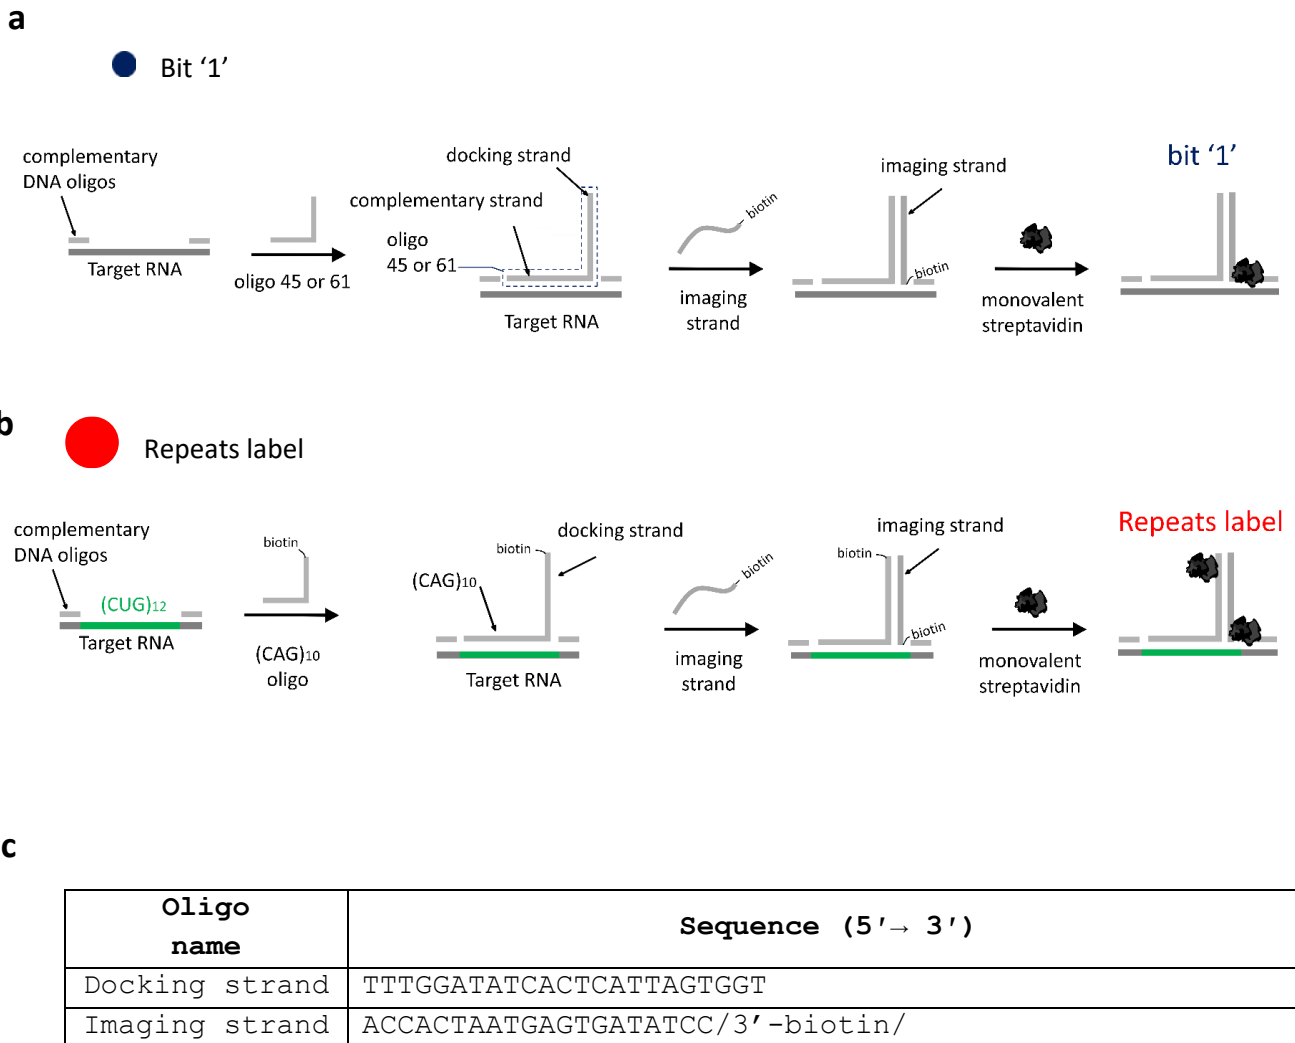

**Supplementary Figure 2.** Assembly of RNA ID. **a** Detailed assembly of '1' bits. The sequence of each '1' bit can be found in Supplementary Table 2, corresponding to oligos 45 and 61. **b** Detailed assembly of repeats label 'R', sequence can be found in Supplementary Table 2 (oligo 76). **c** Table shows the sequence of docking strand overhang and its complementary oligo (imaging strand) which enable streptavidin binding.

### Supplementary Figure 3.

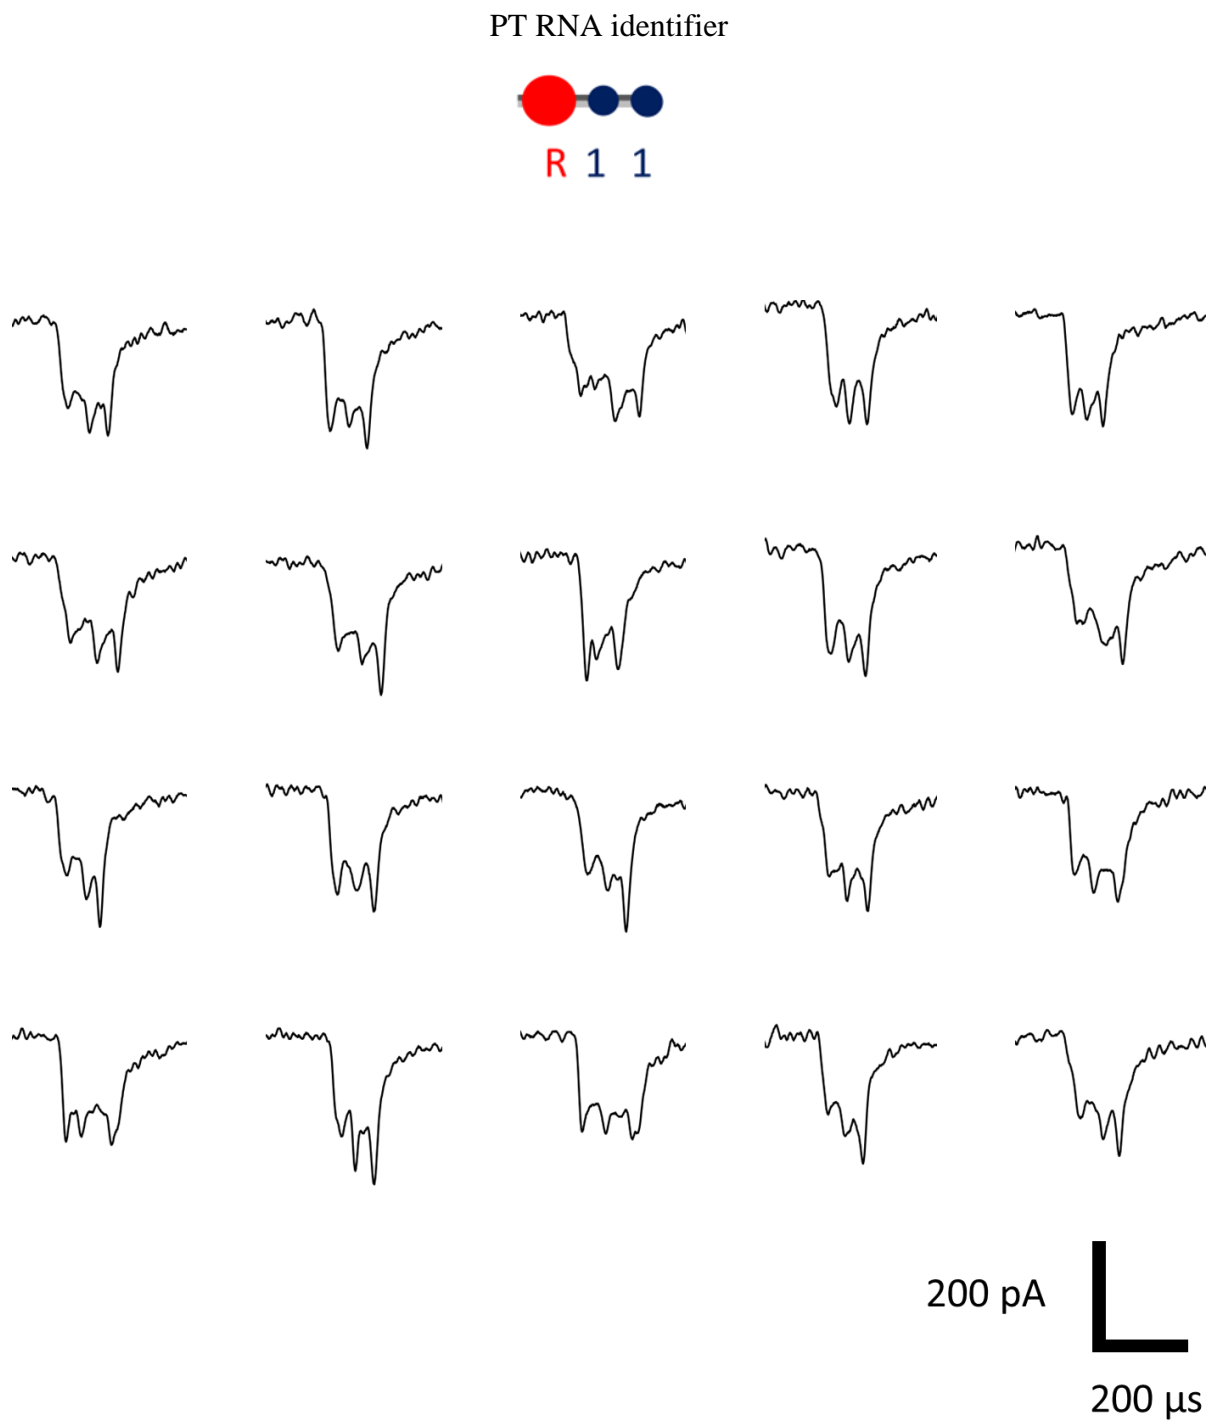

**Supplementary Figure 3.** Nanopore translocation events of RNA identifier from premature transcription termination (PT). These are the first 20 unfolded translocation events detected of PT RNA IDs. Nanopore event variability can be accounted to the physical configuration-dependent RNA ID transport<sup>1</sup>.

## Supplementary Figure 4.

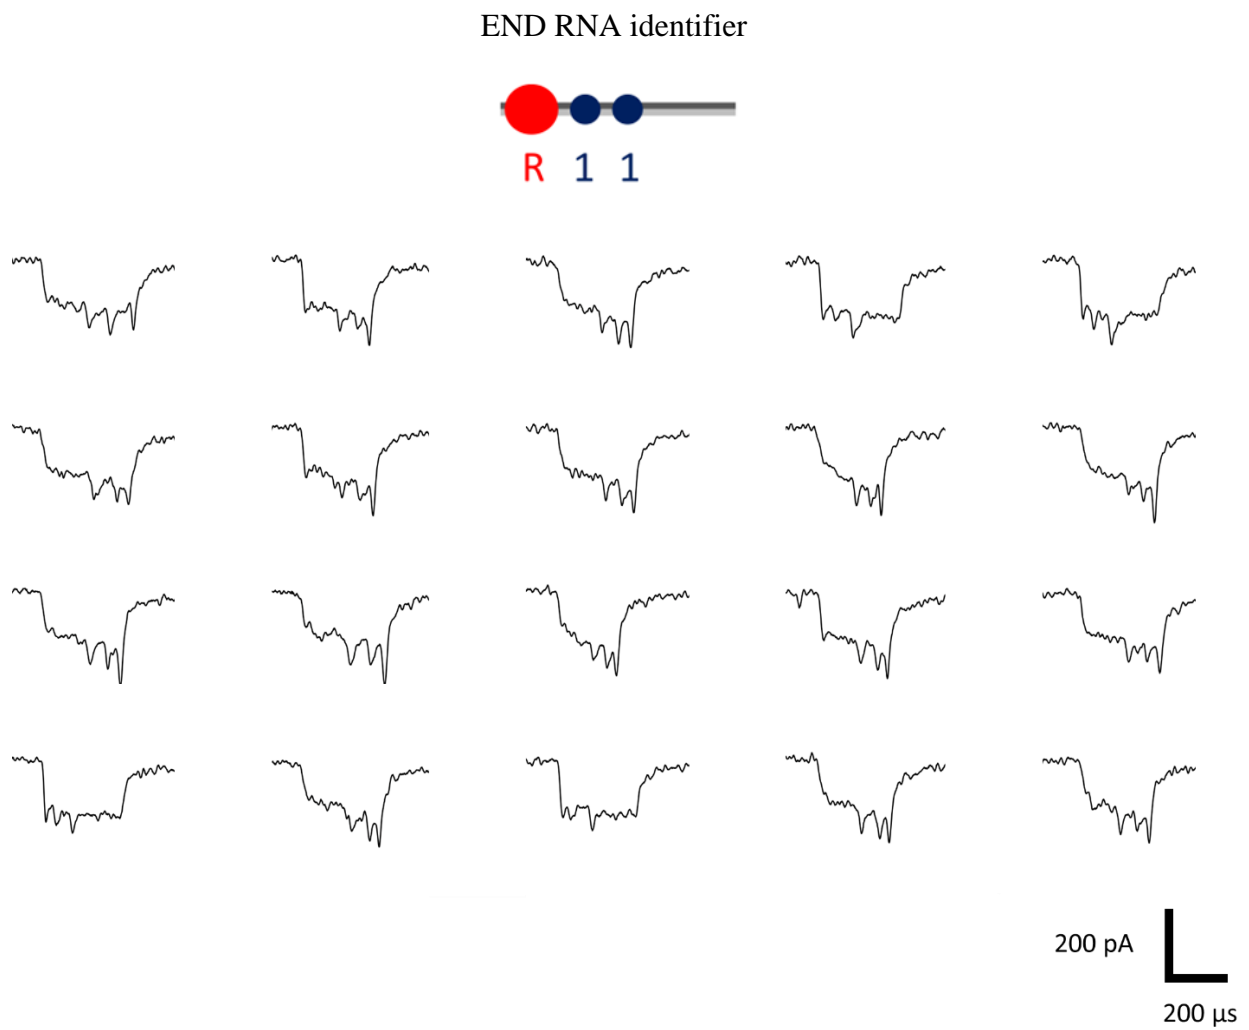

**Supplementary Figure 4.** Nanopore translocation event of RNA identifier from transcription of the complete linear DNA (END). T7RNAP falls off at the end of the linear template causing transcription termination. These are the first 20 unfolded translocation events detected of END RNA IDs.

## Supplementary Figure 5.

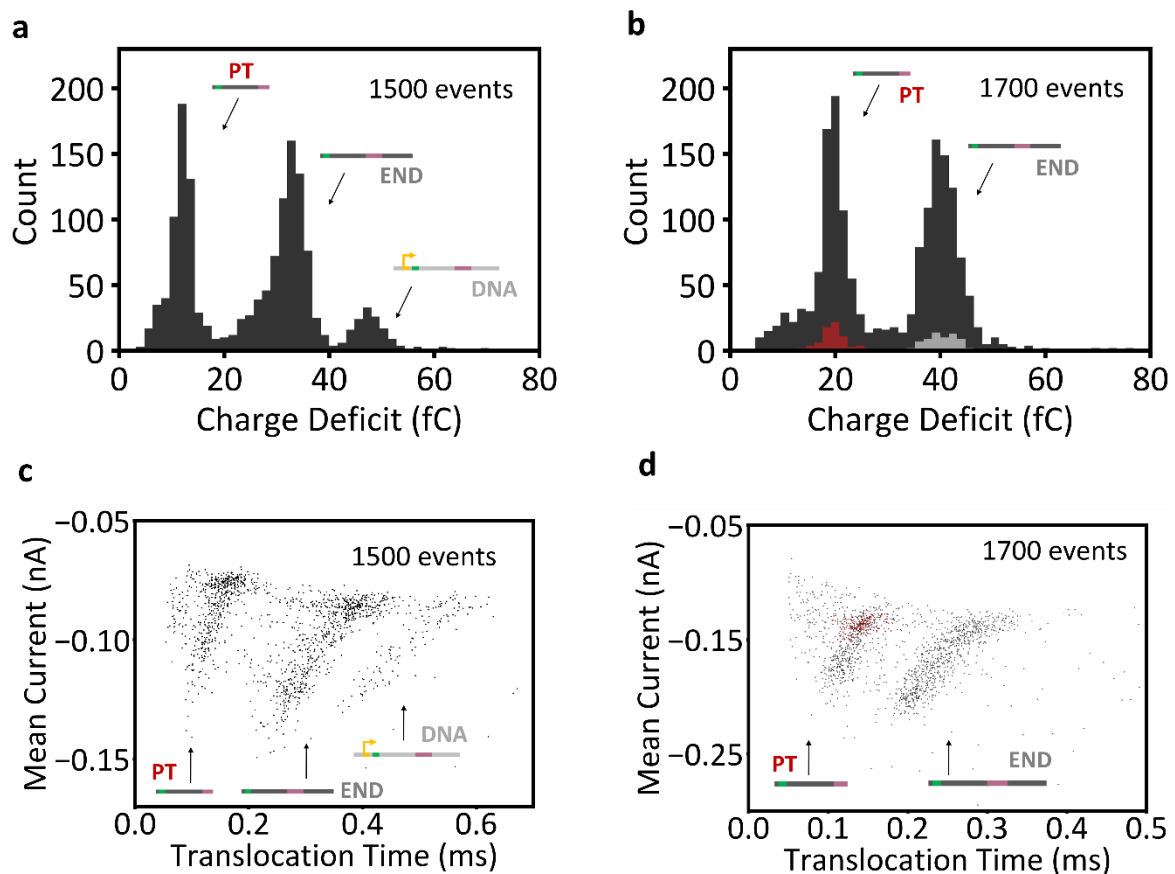

**Supplementary Figure 5.** Characterization of RNA ID using charge deficit, mean current and translocation time. **a** Histogram of the charge deficit of RNA ID still in the presence of the linear DNA template. Histogram shows 3 distributions, the one with the lowest charge deficit is ascribed to premature termination (PT), the middle distribution corresponds to transcription of the full linear DNA (END) and the distribution furthest to the right is ascribed to the linear DNA template. This distribution (composed of 1500 events) includes translocations of molecules with multiple conformations, which include folded events, constructs with knots and unfolded events. **b** After treatment with DNase I, it can be seen how the distribution furthest to the right, ascribed to DNA, is removed. Unfolded translocations of both PT (red) and END (gray) RNA IDs (presented in Figure 2c) describe the entire sample, despite their conformation, while enabling single-molecule sizing. These distributions correspond to the same nanopore measurement presented in Figure 2. **c** Scatter plot of mean current against translocation time shows three distinct distributions, attributed to PT RNA IDs, END RNA IDs, and the linear template (from left to right). Unfolded molecules take longer to translocate through the pore than folded molecules but cover less cross-sectional area of the pore while translocating,

producing a less significant drop in ionic current for longer times. Plotting events with different conformations produces this type of distribution, with unfolded events at the top, and folded events at the bottom of each distribution. **d** Selection of unfolded events (in the sample treated with DNase I) is performed to describe each distribution. Unfolded events were found at the top of each distribution, and they are representative of the whole sample.

## Supplementary Figure 6.

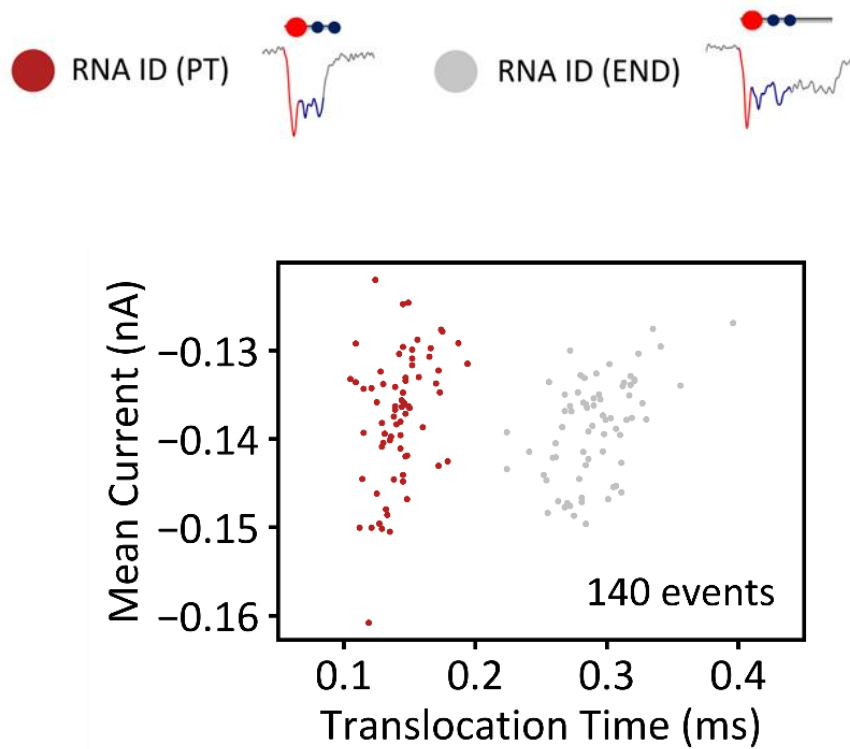

**Supplementary Figure 6.** Scatter plot of mean current against translocation time for unfolded END (red) and PT (gray) RNA IDs, which depicts two distinct populations. This demonstrates that plotting these two parameters for transcripts with different termination sites enables their distinction.



## Supplementary Figure 7.

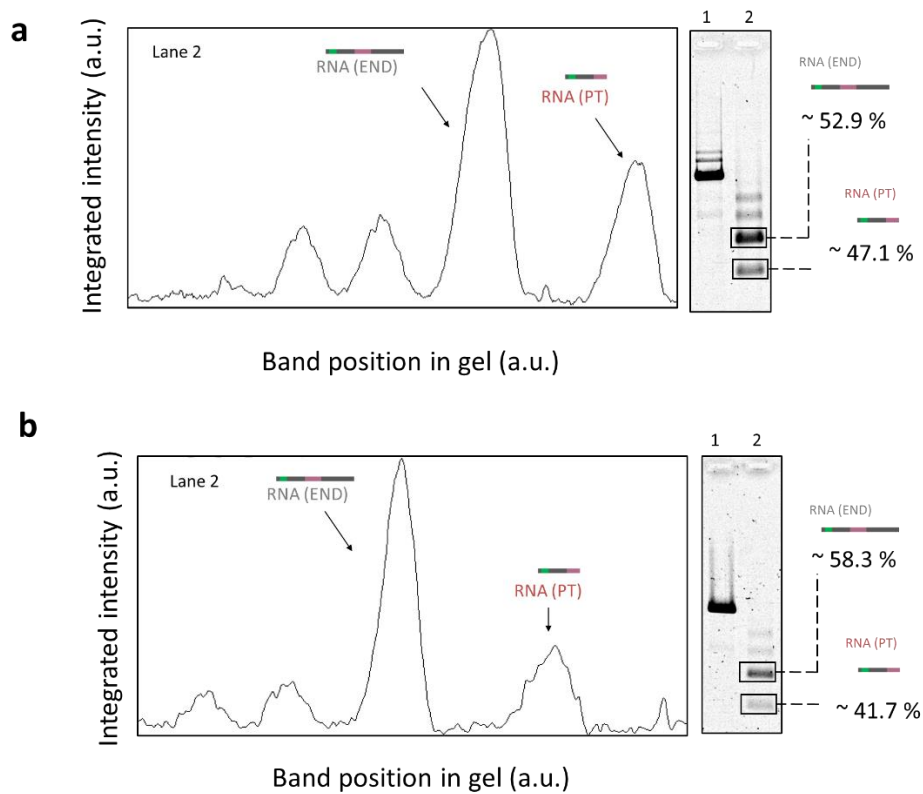

For **a**

| Lane | Molecule  | Intensity profile (a.u.) | Normalized intensity profile (a.u./bp) |
|------|-----------|--------------------------|----------------------------------------|
| 1    | RNA (PT)  | 8181.711                 | 5.389                                  |
|      | RNA (END) | 17336.317                | 6.049                                  |

For **b**

| Lane | Molecule  | Intensity profile (a.u.) | Normalized intensity profile (a.u./bp) |
|------|-----------|--------------------------|----------------------------------------|
| 1    | RNA (PT)  | 5107.296                 | 3.364                                  |
|      | RNA (END) | 13481.004                | 4.703                                  |

**Supplementary Figure 7.** Quantitative analysis of premature transcription termination in OriC using agarose gel electrophoresis. **a** The gel shows the linearized construct in lane 1 and the DNase I treated transcripts in lane 2. The two topmost bands in lane 2 are attributed to RNA side products. The two lower bands correspond to END RNA and PT RNA, from top to bottom.

The intensity profile of these two bands was plotted and the area of each peak was computed. The peak areas were normalized by the number of base pairs of each transcript to obtain an estimate of transcript abundance. Gel suggests premature transcription termination of ~ 47.1 % in OriC. The same experimental procedure and analysis described was repeated to evaluate variability in RNA abundance quantification. Gel suggests premature transcription termination of ~ 41.7 % in OriC, indicating good reproducibility. Lane 1 – linear DNA, Lane 2 - DNase treated transcripts. Gel: 1 % (w/v) agarose, 1 × TBE, 0.02% sodium hypochlorite.

## Supplementary Figure 8.

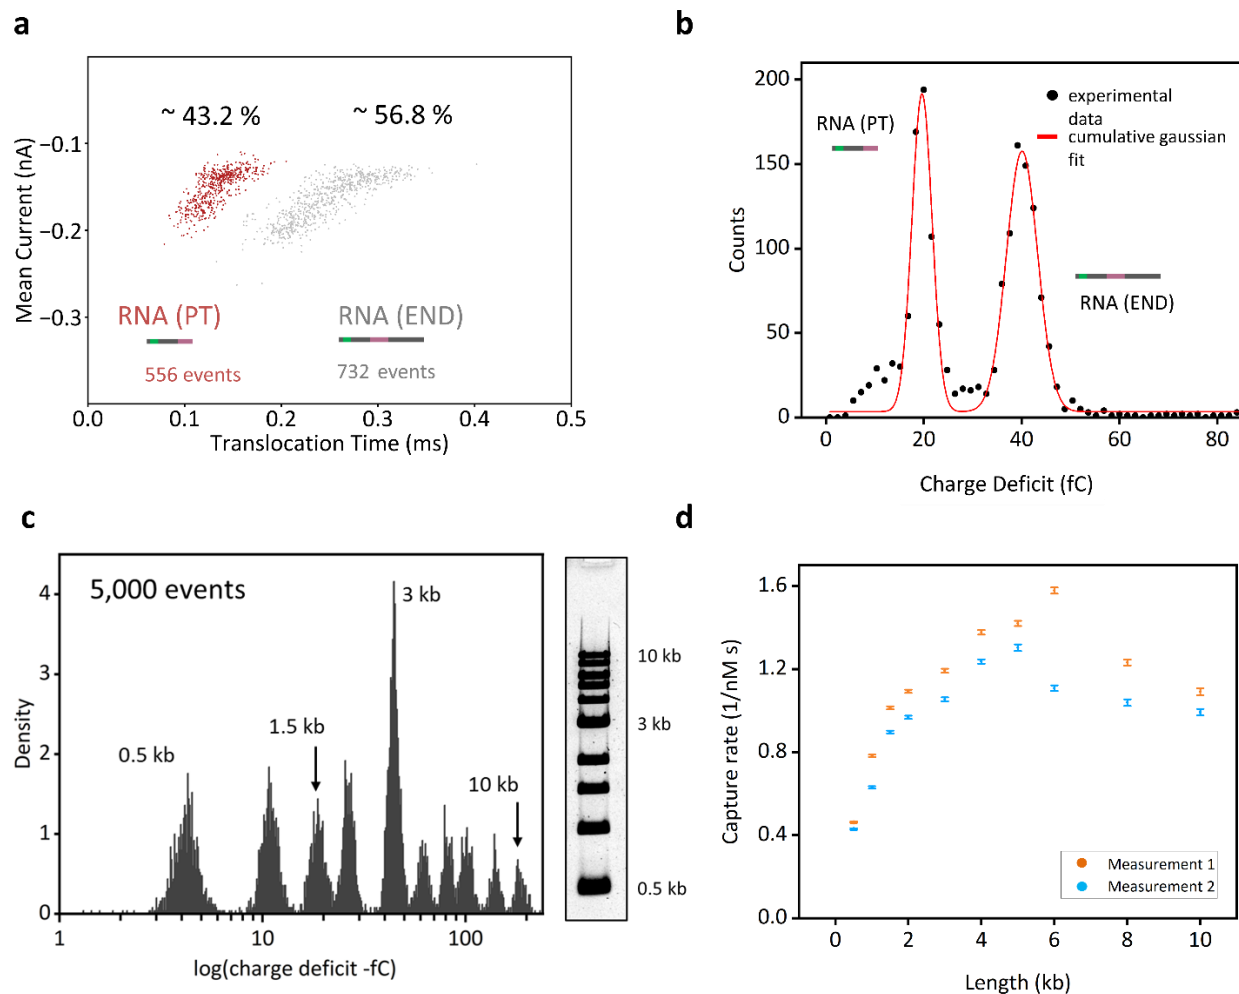

**Supplementary Figure 8.** Quantitative study of PT RNA IDs and END RNA IDs events detected in nanopore sensors. **a** As illustrated in Supplementary Figure 5c and Supplementary Figure 5d, scatter plots of mean current against translocation time can be used to identify RNA IDs from transcripts with different termination sites. Scatter plot exhibits two distributions: the one from the left is ascribed to PT RNA ID and the distribution at the right corresponds to END RNA ID. The events within each of these distributions were counted by establishing lower and upper limits in charge deficit, the rest of the events were discarded. The upper limit for RT RNA IDs was 25 fC, and the lower limit was 15 fC. For END RNA IDs the upper limit was 50 fC and the lower limit was 30 fC. 556 events were detected for RT RNA IDs and 732 events were identified for END RNA IDs, suggesting  $\sim 43.2\%$  termination in OriC. **b** Cumulative Gaussian fit of PT and END RNA IDs. The lowest charge deficit peak is ascribed to premature termination (PT) and the middle peak corresponds to full-length RNA transcript (END). Comparison of the areas of PT RNA ID and END RNA ID fits suggest  $\sim 44\%$  transcription

termination. **c** A 1kb DNA ladder (NEB) containing DNA molecules from 0.5 kb to 10 kb was used to study capture rate variability in our nanopore system ascribed to a difference in length-dependent capture rate<sup>2,3</sup>. The concentration is known for the DNA of each length, based on information provided by the manufacturer. Characterization of the DNA ladder in nanopores was performed in duplicate. **d** Capture rate for each DNA molecule length included in the DNA ladder for both measurements.

### Supplementary Figure 9.

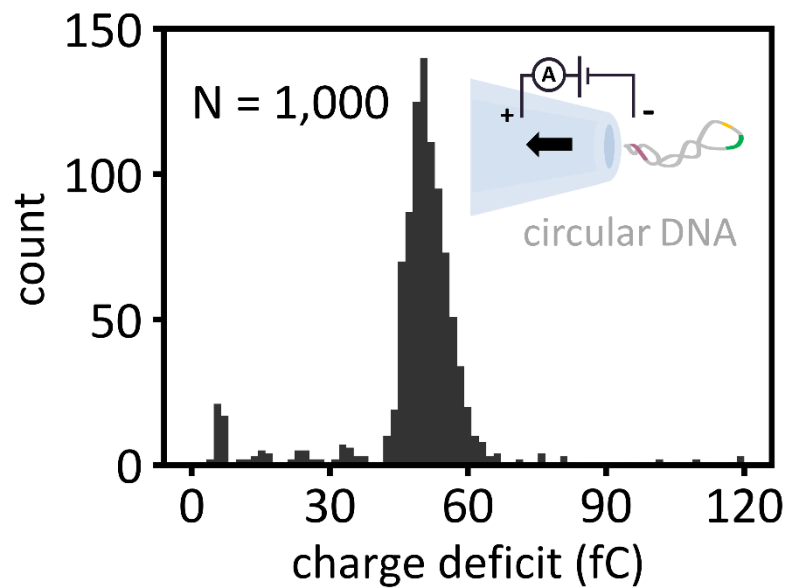

**Supplementary Figure 9.** The 3.1 kbp circular DNA used as the template for rolling circle transcription was characterized using nanopore sensing. The charge deficit of the translocation events shows a unimodal distribution, demonstrating the presence of a single DNA construct. This also confirms RNA is produced from circle rolling transcription of the 3.1 kbp circular DNA, and not by transcription of DNA dimers or trimers of the 3.1 kbp DNA which could be a possible interpretation of agarose gel electrophoresis. Here we also showcase the clarity nanopore sensing provides for the elucidation of DNA identity.

## Supplementary Figure 10.

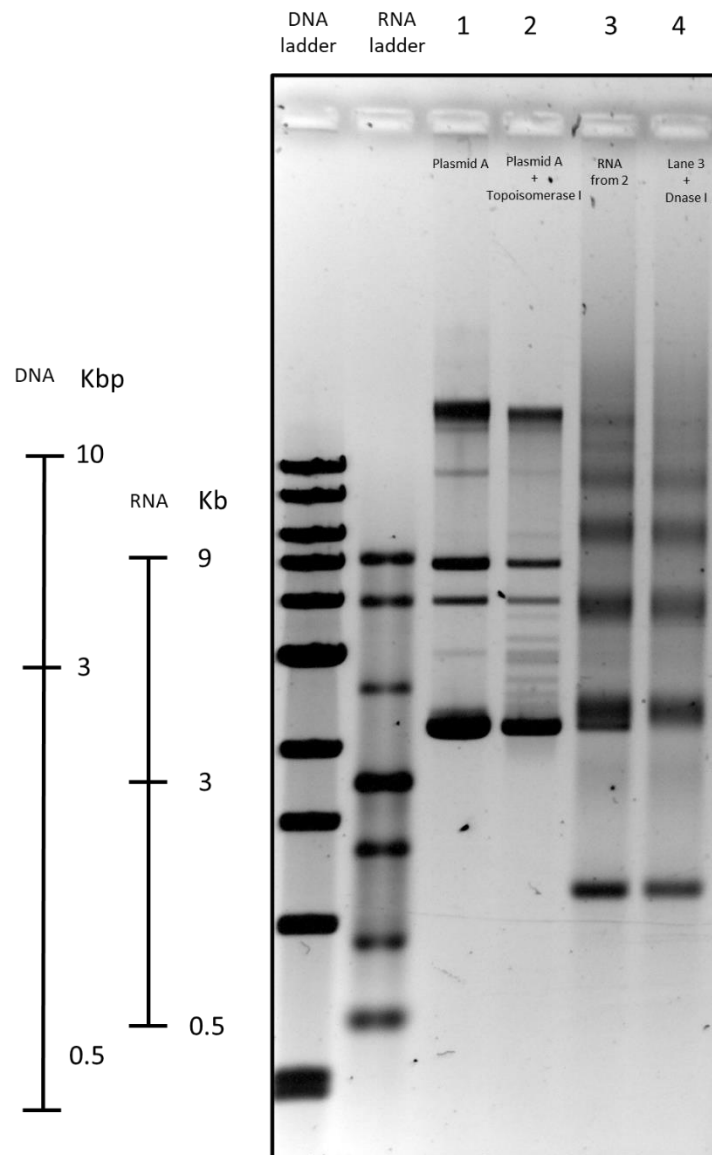

**Supplementary Figure 10.** Rolling circle transcription of circular DNA construct. DNA ladder and ssRNA ladder are included on both sides of the gel. Lane 1 – Circular plasmid with 12 CTG repeats (sequence of circular plasmid in Supplementary Table 1). The multiple bands are ascribed to the physical configurations that supercoiled DNA has while being electrophoretically driven through the agarose gel. Lane 2 – circular plasmid from lane 1 treated with *Escherichia coli* Topoisomerase I to induce plasmid relaxation. Lane 3 – RNA from transcription of Topoisomerase I treated circular plasmid in lane 2. Lane 4 – RNA from lane 3 treated with DNase I. From DNase I treatment, DNA band located at ~3 kbp (DNA) is removed. The rest of the bands, ascribed to RNA products of the multiple transcription cycles, remain.

## Supplementary Figure 11.

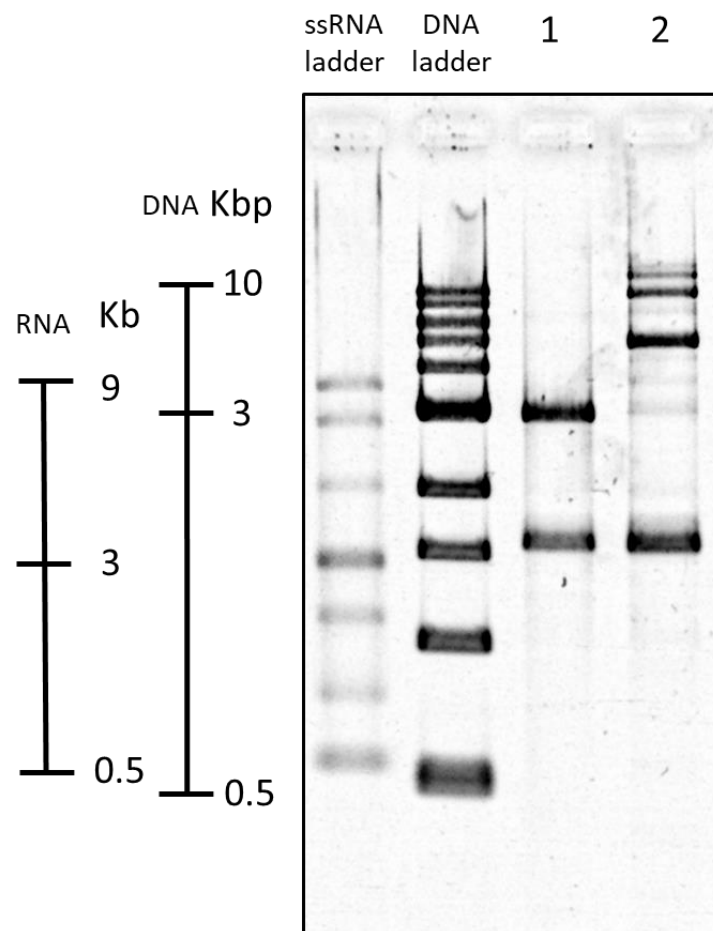

**Supplementary Figure 11.** RNA ID of transcripts from transcription of linear DNA construct and rolling circle transcription of circular DNA construct (sequence in Supplementary Table 1). The agarose gel shows a DNA ladder and ssRNA and DNA ladder on the left side. Lane 1 – RNA ID assembled from RNA from transcription of linear DNA template. Lane 2 - RNA ID assembled from transcripts of rolling circle transcription. Gel: 1 % (w/v) agarose, 1 × TBE, 0.02% sodium hypochlorite.

## Supplementary Figure 12.

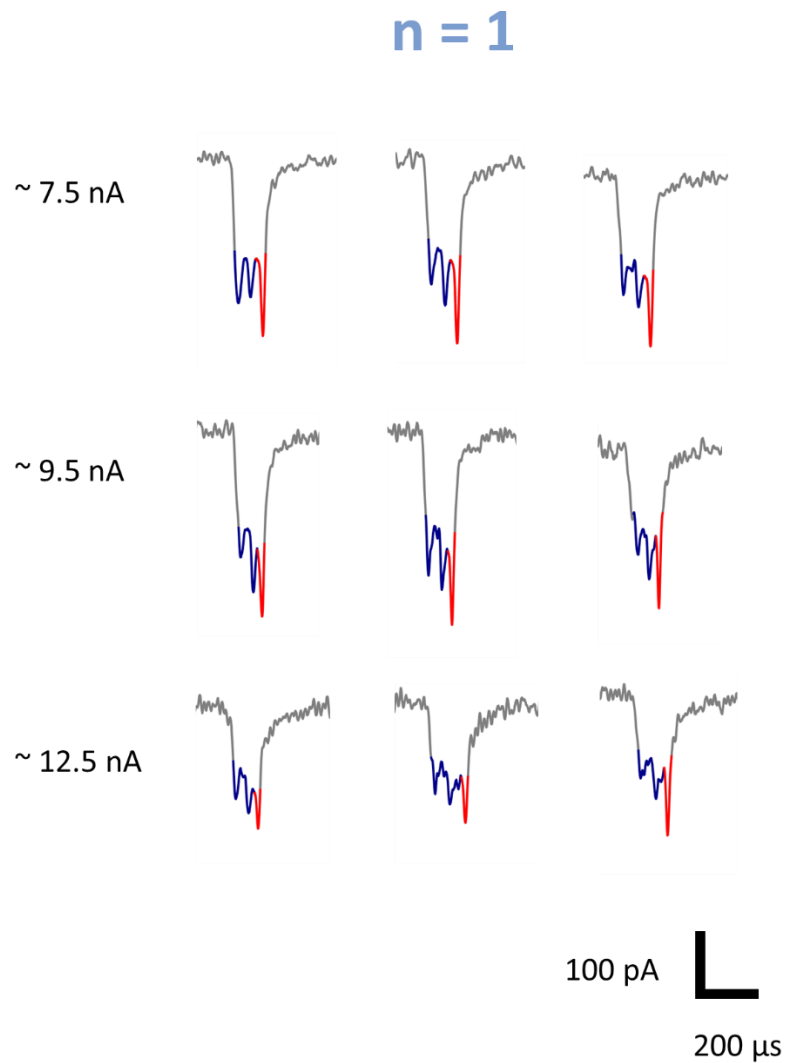

**Supplementary Figure 12.** N = 1 example events. Example nanopore events of RNA IDs produced from one transcription cycle (N = 1) measured in pores with different sizes, which exhibit different signal to noise ratio. Variation in pore size can be inferred from changes in the ionic current baseline. All measurements were performed under the same applied voltage of 600 mV. Larger pores have a larger ionic current baseline.



### Supplementary Figure 13.

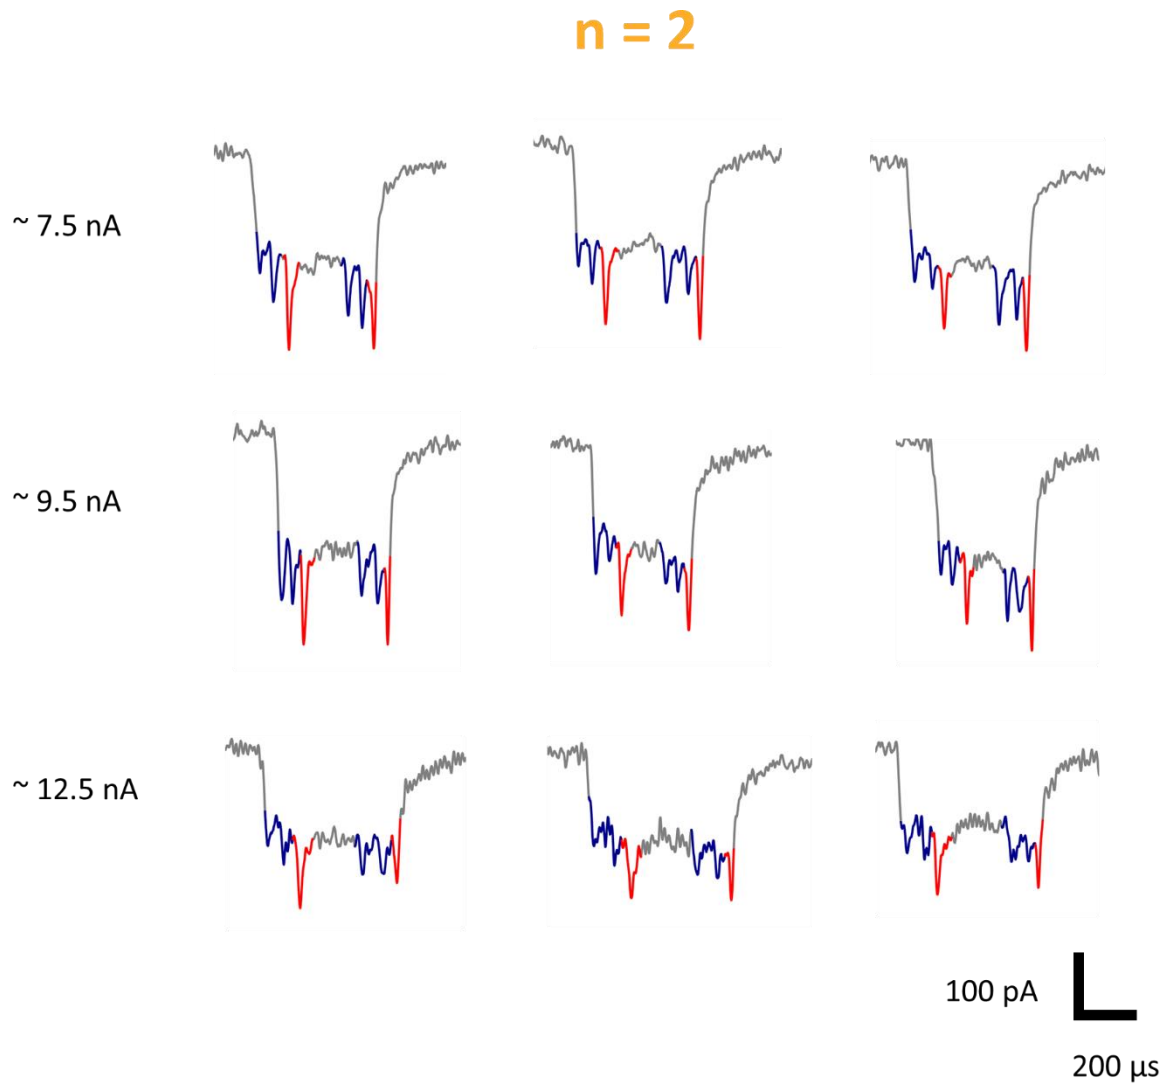

**Supplementary Figure 13.**  $N = 2$  example events. Example nanopore events of RNA IDs produced from two transcription cycles ( $N = 2$ ) measured in pores with different sizes, which exhibit different signal to noise ratio. Variation in pore size can be inferred from changes in the ionic current baseline. All measurements were performed under the same applied voltage of 600 mV. Larger pores have a larger ionic current baseline.

## Supplementary Figure 14.

**n = 3**

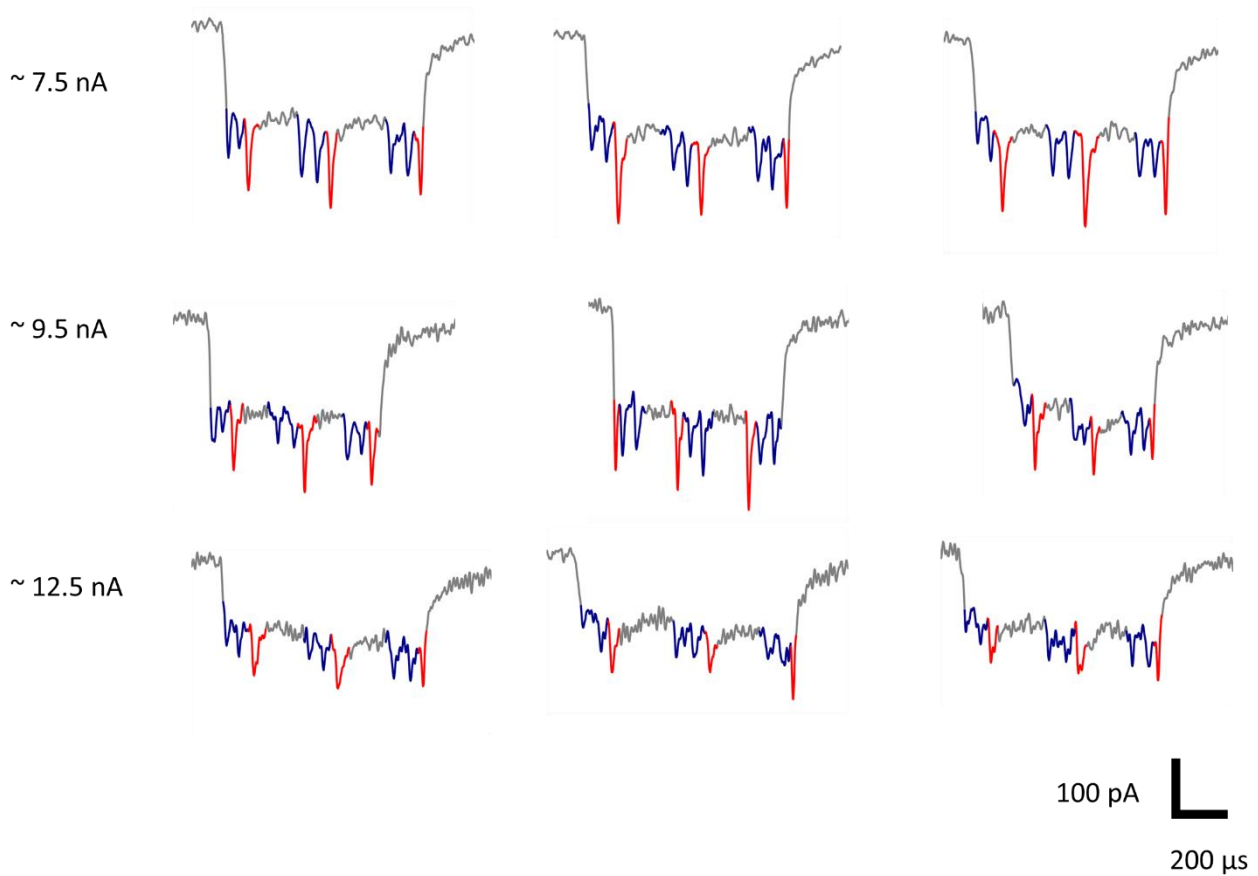

**Supplementary Figure 14.** N = 3 example events. Example nanopore events of RNA IDs produced from three transcription cycles (N = 3) measured in pores with different sizes, which exhibit different signal to noise ratio. Variation in pore size can be inferred from changes in the ionic current baseline. All measurements were performed under the same applied voltage of 600 mV. Larger pores have a larger ionic current baseline.

## Supplementary Figure 15.

**n = 4**

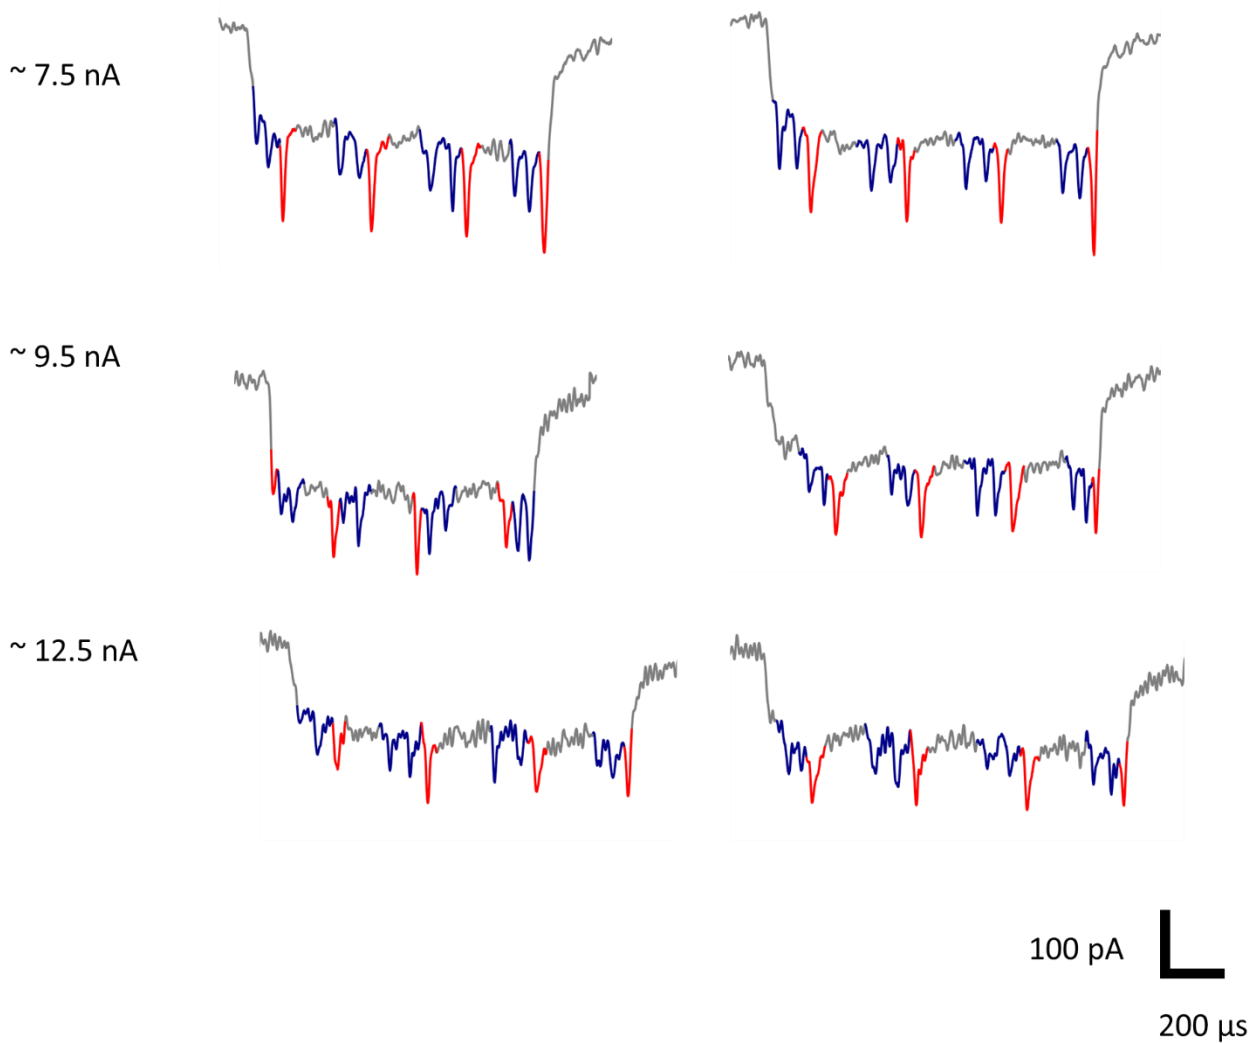

**Supplementary Figure 15.** N = 4 example events. Example nanopore events of RNA IDs produced from four transcription cycles (N = 4) measured in pores with different sizes, which exhibit different signal to noise ratio. Variation in pore size can be inferred from changes in the ionic current baseline. All measurements were performed under the same applied voltage of 600 mV. Larger pores have a larger ionic current baseline.

## Supplementary Figure 16.

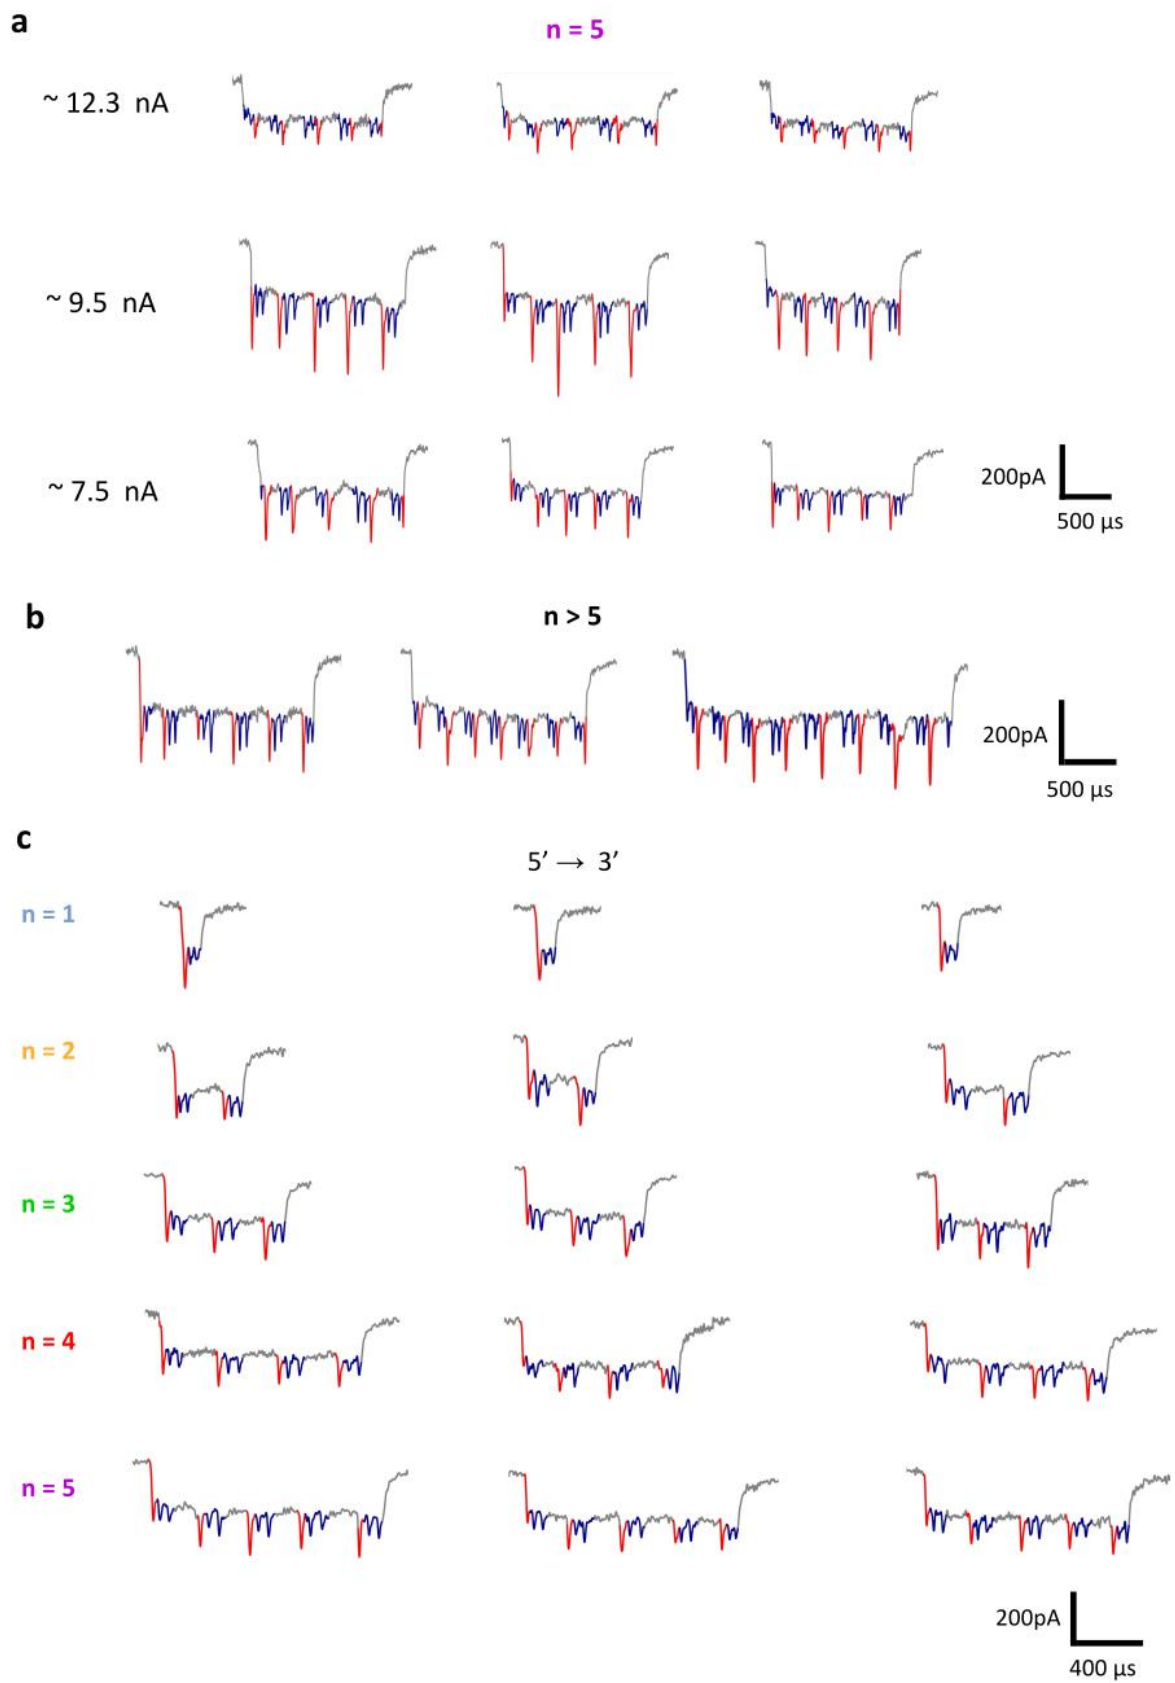

**Supplementary Figure 16.** RNA ID nanopore events for transcription cycles  $N = 5$  and  $N > 5$  example events. **a** Example of nanopore events of RNA IDs produced from five transcription cycles ( $N = 5$ ) measured in pores with different sizes. All measurements were performed under the same applied voltage of 600 mV. **b** Also, RNA IDs with  $N > 5$  were identified, example events are shown from different nanopore measurements. **c** Translocation of RNA IDs for each transcription cycle that entered to the pore in the 5' to 3' direction.

**Supplementary Figure 17.**

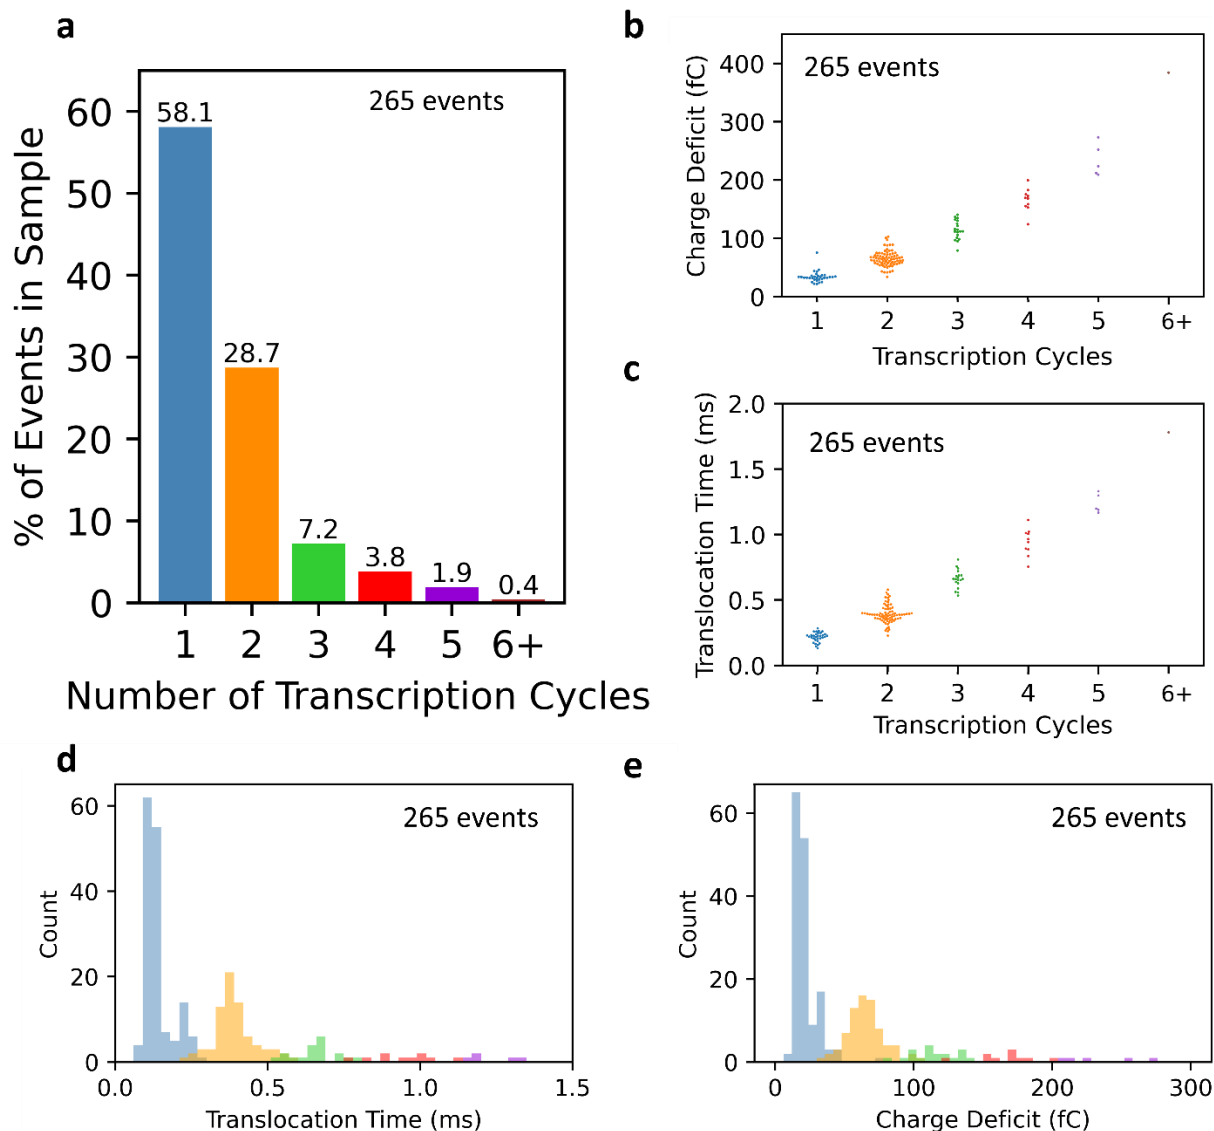

**Supplementary Figure 17.** Translocation time and charge deficit of RNA IDs from rolling circle transcription. **a** For individual nanopore measurements presented in Figure 3e, 265 unfolded events were identified. Bar plots show the relative abundance of each RNA ID classified by number of transcriptions cycle. **b** Swarm plot of charge deficit per transcription cycle. **c** Swarm plot of translocation time per transcription cycle. **c** and **d** correspond to histograms of translocation time and charge deficit, respectively, presented in Figure 3e, but using a linear scale on the y axis instead of a logarithmic scale.

## Supplementary Figure 18.

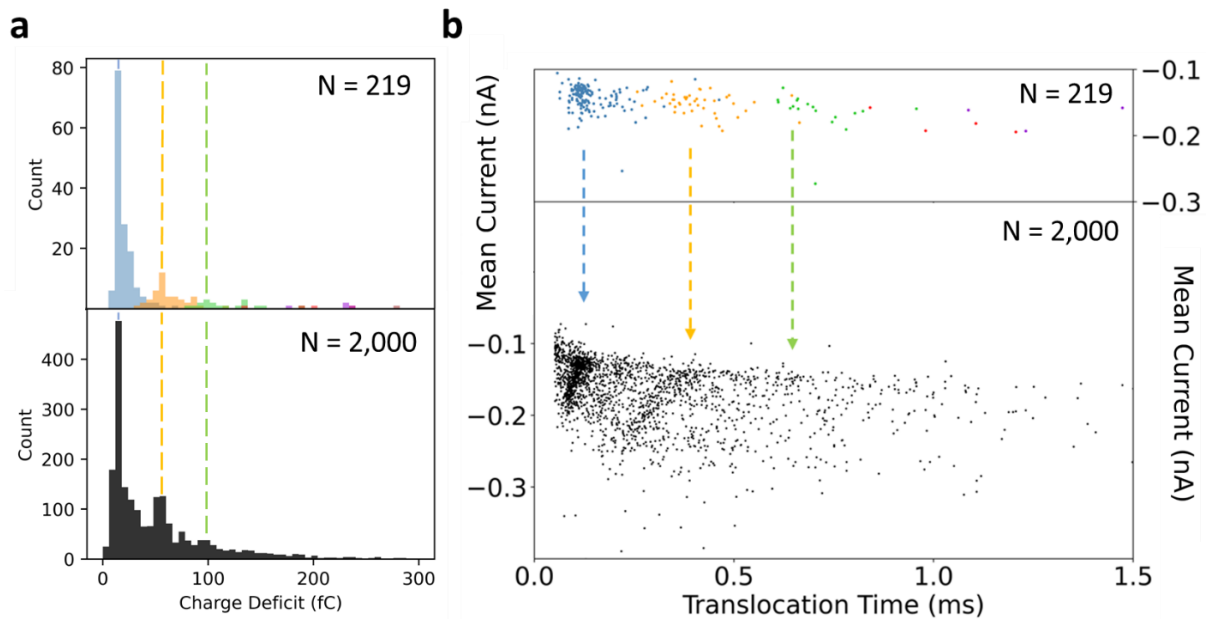

**Supplementary Figure 18.** Unfolded (linear) RNA IDs events are representative of the events with different conformations. **a** Histogram of charge deficit for all translocations detected in one nanopore measurement (black, 2000 events). The selection of 219 unfolded events shows a distribution of charge deficit which is representative of the distribution of all translocations detected, therefore these events can be used to describe the sample and gain single-molecule information from the RNA ID design. The charge density distributions produced between the main distributions (green and yellow) are ascribed to fall-off of T7RNAP. **b** Scatter plot of mean current against translocation time, which also shows that the selection of unfolded can be used for the description of a sample within a defined parameter space.

## Supplementary Figure 19.

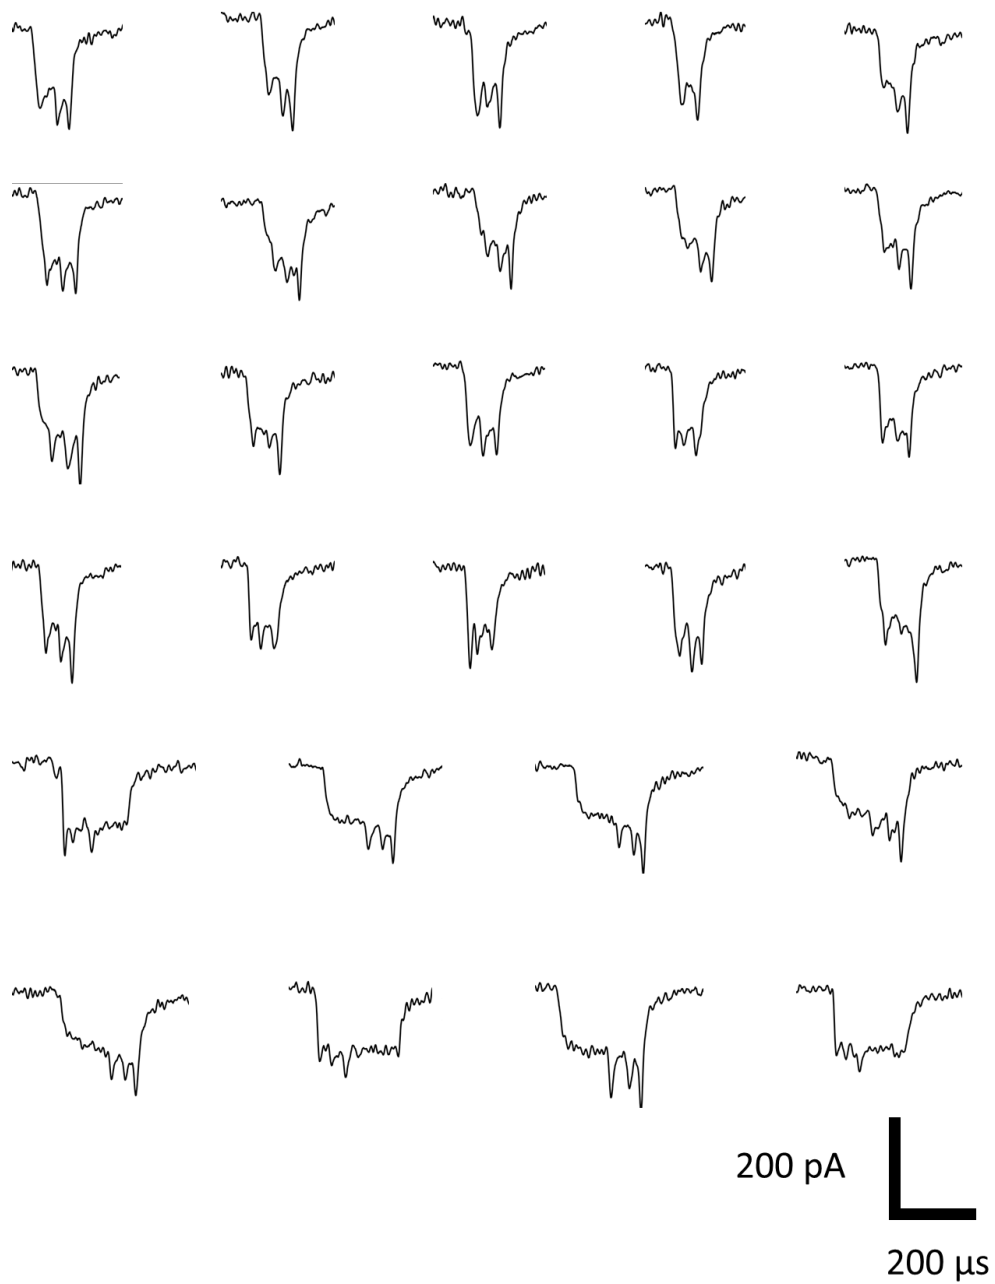

**Supplementary Figure 19.** Example nanopore events of RNA IDs produced from one transcription cycle ( $N = 1$ ) used for single-molecule sizing in Figure 4d. These are the first 28 unfolded translocation events detected for  $N = 1$ .



## Supplementary Figure 20.

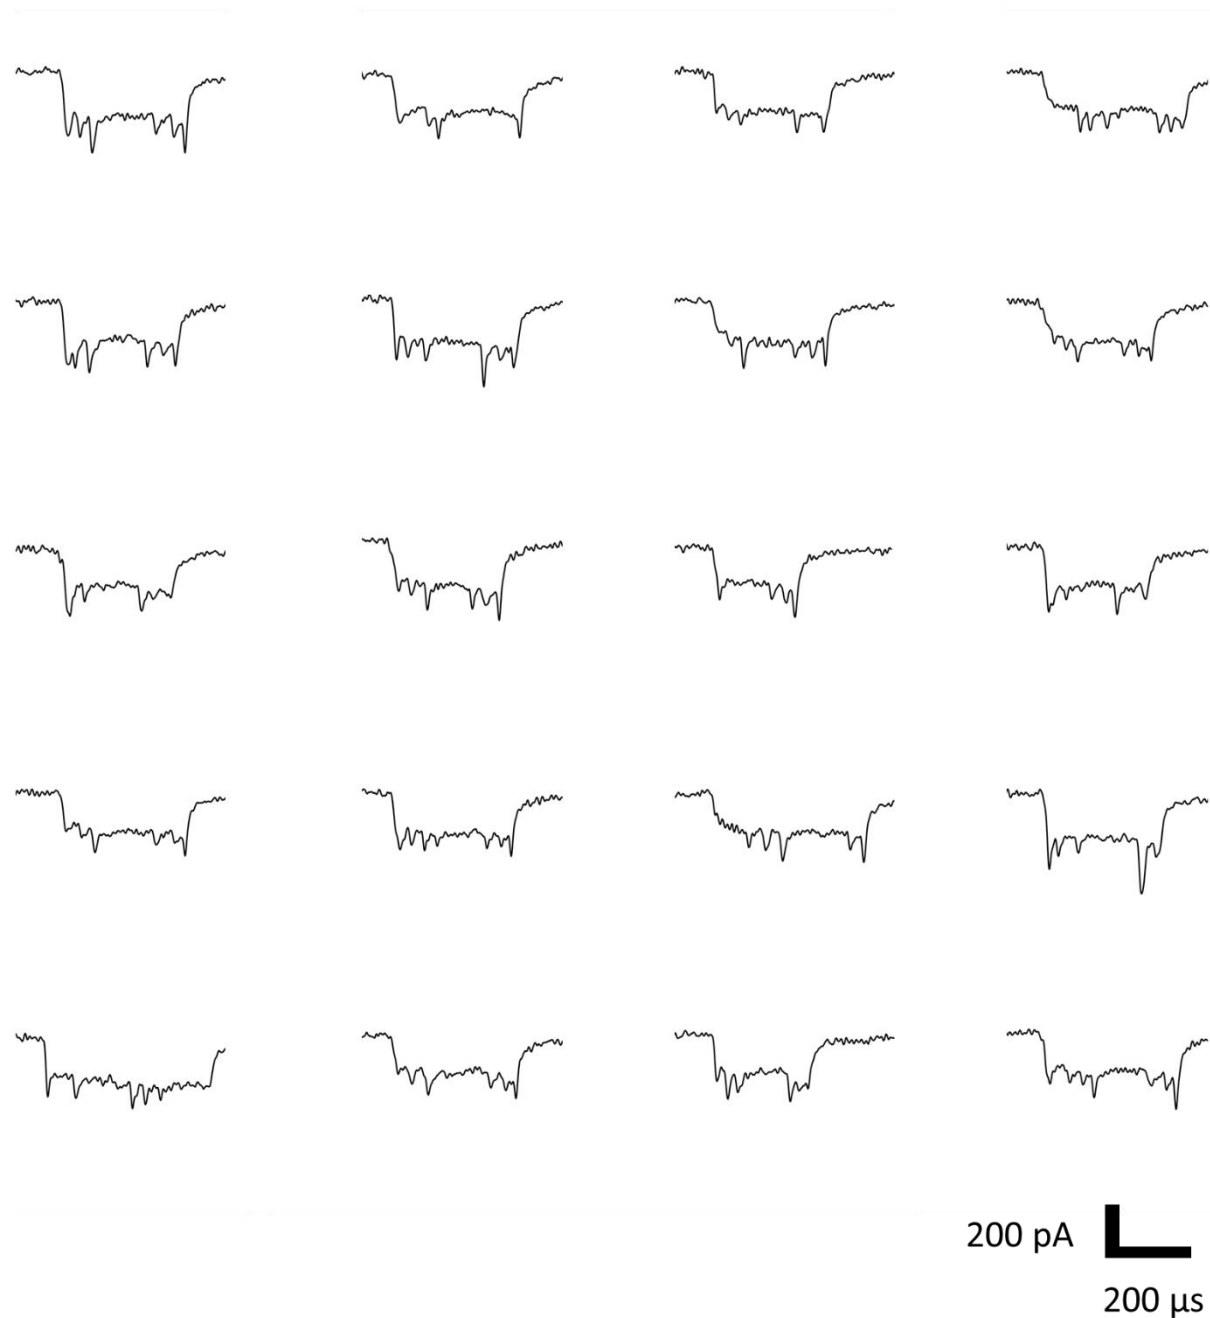

**Supplementary Figure 20.** Example nanopore events of RNA IDs produced from two transcription cycles ( $N = 2$ ) used for single-molecule sizing in Figure 4d. These are the first 20 unfolded translocation events detected for RNA IDs with  $N = 2$ .

## Supplementary Figure 21.

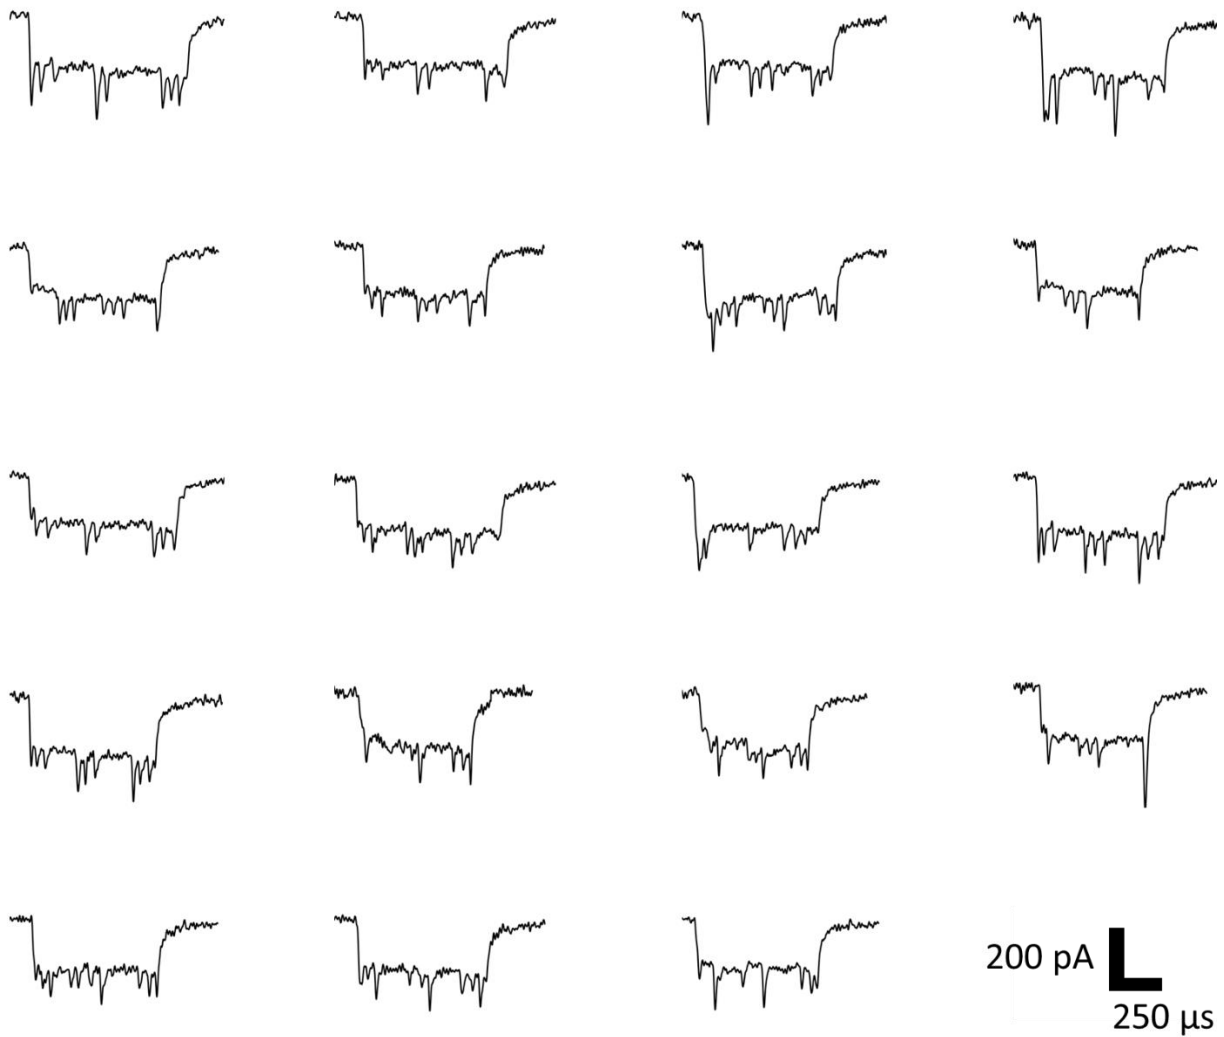

**Supplementary Figure 21.** Example nanopore events of RNA IDs produced from three transcription cycles ( $N = 3$ ) used for single-molecule sizing in Figure 4d. These are the first 20 unfolded translocation events detected for RNA IDs with  $N = 3$ .

## Supplementary Figure 22.

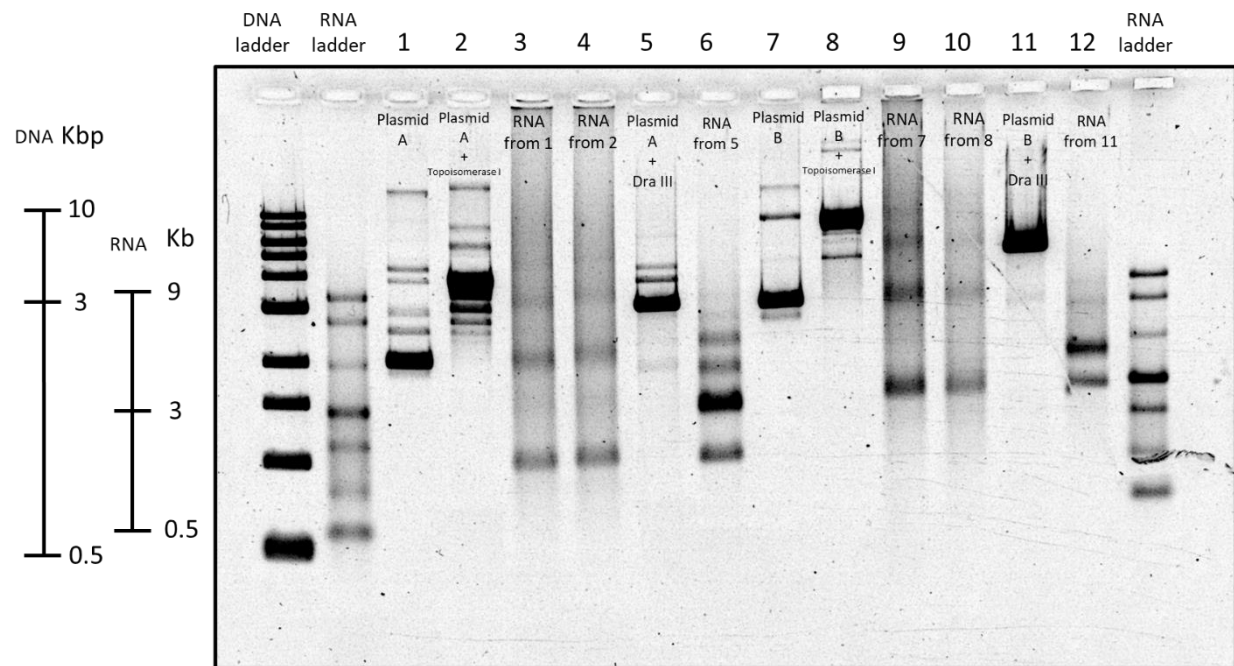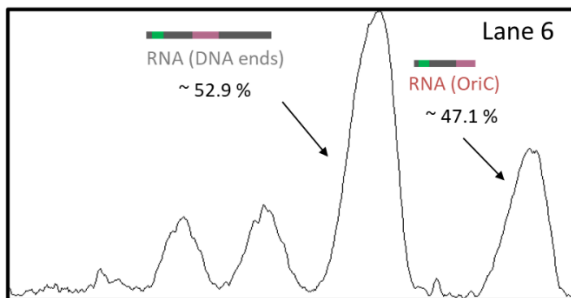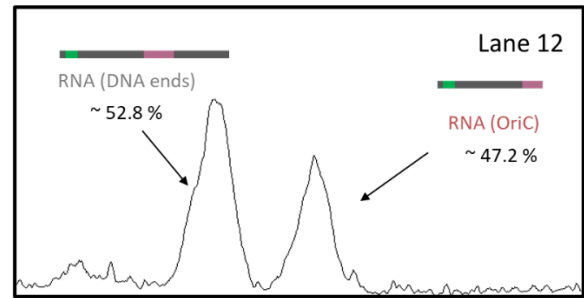

| Plasmid | Molecule           | Intensity profile (a.u.) | Normalized intensity profile (a.u./bp) |
|---------|--------------------|--------------------------|----------------------------------------|
| A       | RNA (OriC)         | 8181.711                 | 5.389                                  |
|         | RNA (Template end) | 17336.317                | 6.049                                  |
| B       | RNA (OriC)         | 5889.418                 | 1.983                                  |
|         | RNA (Template end) | 9616.418                 | 2.221                                  |

**Supplementary Figure 22.** Transcription of circular and linear DNA templates with the OriC at different distances from the T7 RNA polymerase promoter. DNA ladder and ssRNA ladder are included. Lane 1 – circular DNA plasmid with 12 CTG repeats (sequence in Supplementary Table 1). Lane 2 – circular plasmid from lane 1 treated with *Escherichia coli* Topoisomerase I. Lane 3 – DNase I treated RNA from transcription of circular plasmid in lane 1. Lane 4 – DNase I treated RNA from transcription of Topoisomerase I treated circular plasmid in lane 2.

Lane 5 – linear DNA digested using DraIII-HF. Lane 6 – DNase treated RNA from transcription of linear DNA in lane 5. Lane 7 – 4527 kbp circular DNA plasmid (sequence in Supplementary Table 4). Lane 8 – circular plasmid from lane 7 treated with *Escherichia coli* Topoisomerase I. Lane 9 – DNase I treated RNA from transcription of circular plasmid in lane 7. Lane 10 – DNase I treated RNA from transcription of Topoisomerase I treated circular plasmid in lane 8. Lane 11 – linear DNA digested using DraIII-HF, it is a longer linear DNA than the linear template in lane 5. Lane 12 – DNase treated RNA from transcription of linear DNA in lane 11. The topmost band of lane 12, slightly below 5 kb, corresponds to transcription of the entire linear template, while the band from the bottom, allocated slightly below 3 kb, corresponds to premature termination in the OriC. The position of the bands is in good agreement with the expected premature termination in the OriC (see sequence in Supplementary Table 4). Gel: 1 % (w/v) agarose, 1 × TBE, 0.02% sodium hypochlorite. The intensity profile of both bands in lanes 6 and 12 were plotted and the area of each peak was computed. The peak areas were normalized by the number of base pairs of each transcript to obtain an estimate of transcript abundance. Gel suggests premature transcription termination of ~ 47 % in the OriC in both cases.

### Supplementary Figure 23.

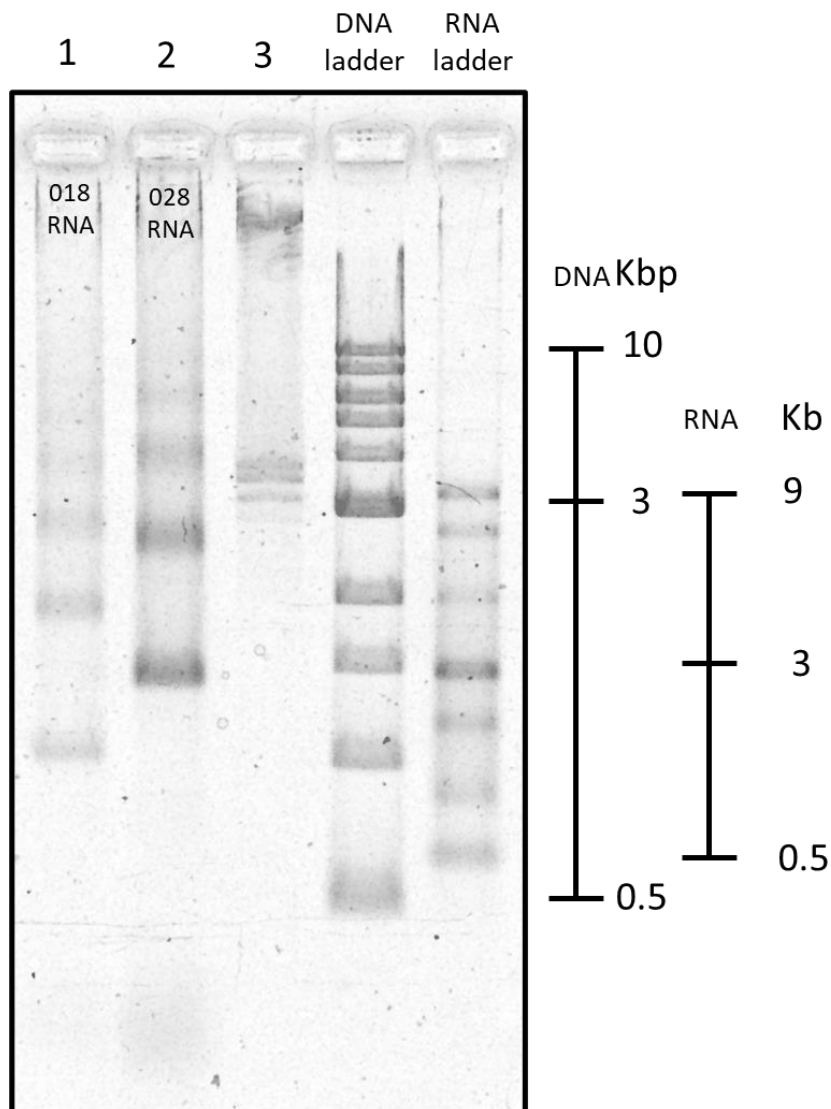

**Supplementary Figure 23.** Rolling circle transcription of circular DNA constructs with different sizes and different distances between the OriC and T7RNAP promoter. The agarose gel shows a DNA ladder and ssRNA ladder on the right side. Lane -1 shows RNA product from rolling circle transcription of circular DNA construct (sequence in Supplementary Table 1) as presented in Figure 3d. Lane 2 displays RNA product from transcription of a larger DNA construct (sequence in Supplementary Table 4) with a larger separation between the OriC and promoter (~3kbp). Each band is ascribed to transcription termination at the OriC at the different transcription cycles. The Content of lane 3 is unknown. Gel: 1 % (w/v) agarose, 1 × TBE, 0.02% sodium hypochlorite.

## Supplementary Figure 24.

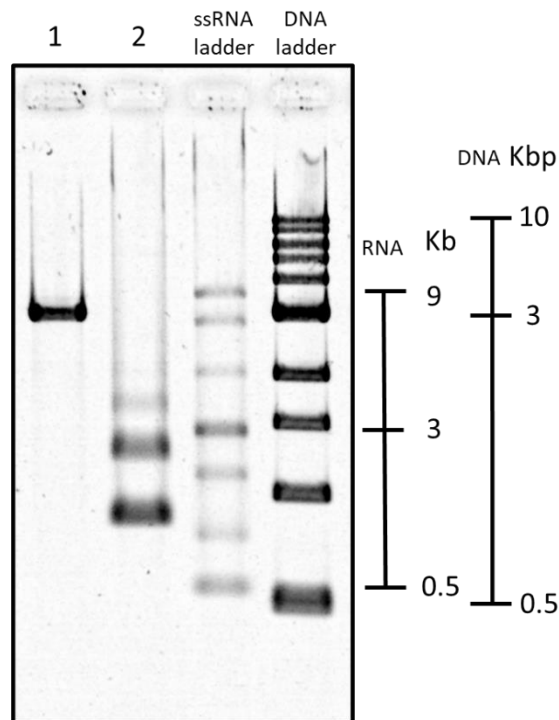

**Supplementary Figure 24.** Transcription of pFGG linear DNA template. ssRNA and DNA ladder are included on the right side of the gel. Lane 1 – 2972 kbp DNA construct with no tandem repeats (sequence in Supplementary Table 5) linearized with ScaI. Lane 2 – DNase treated RNA from transcription of linear DNA in lane 1. The bottom band is ascribed to transcription until the restriction site of ScaI (1192 bp), where termination occurs as the T7RNAP falls off from the DNA template. The top band, located between 2 and 3 kb corresponds to termination at the OriC in uncut plasmids. Gel: 1 % (w/v) agarose, 1 × TBE, 0.02% sodium hypochlorite.

**Supplementary Figure 25.**

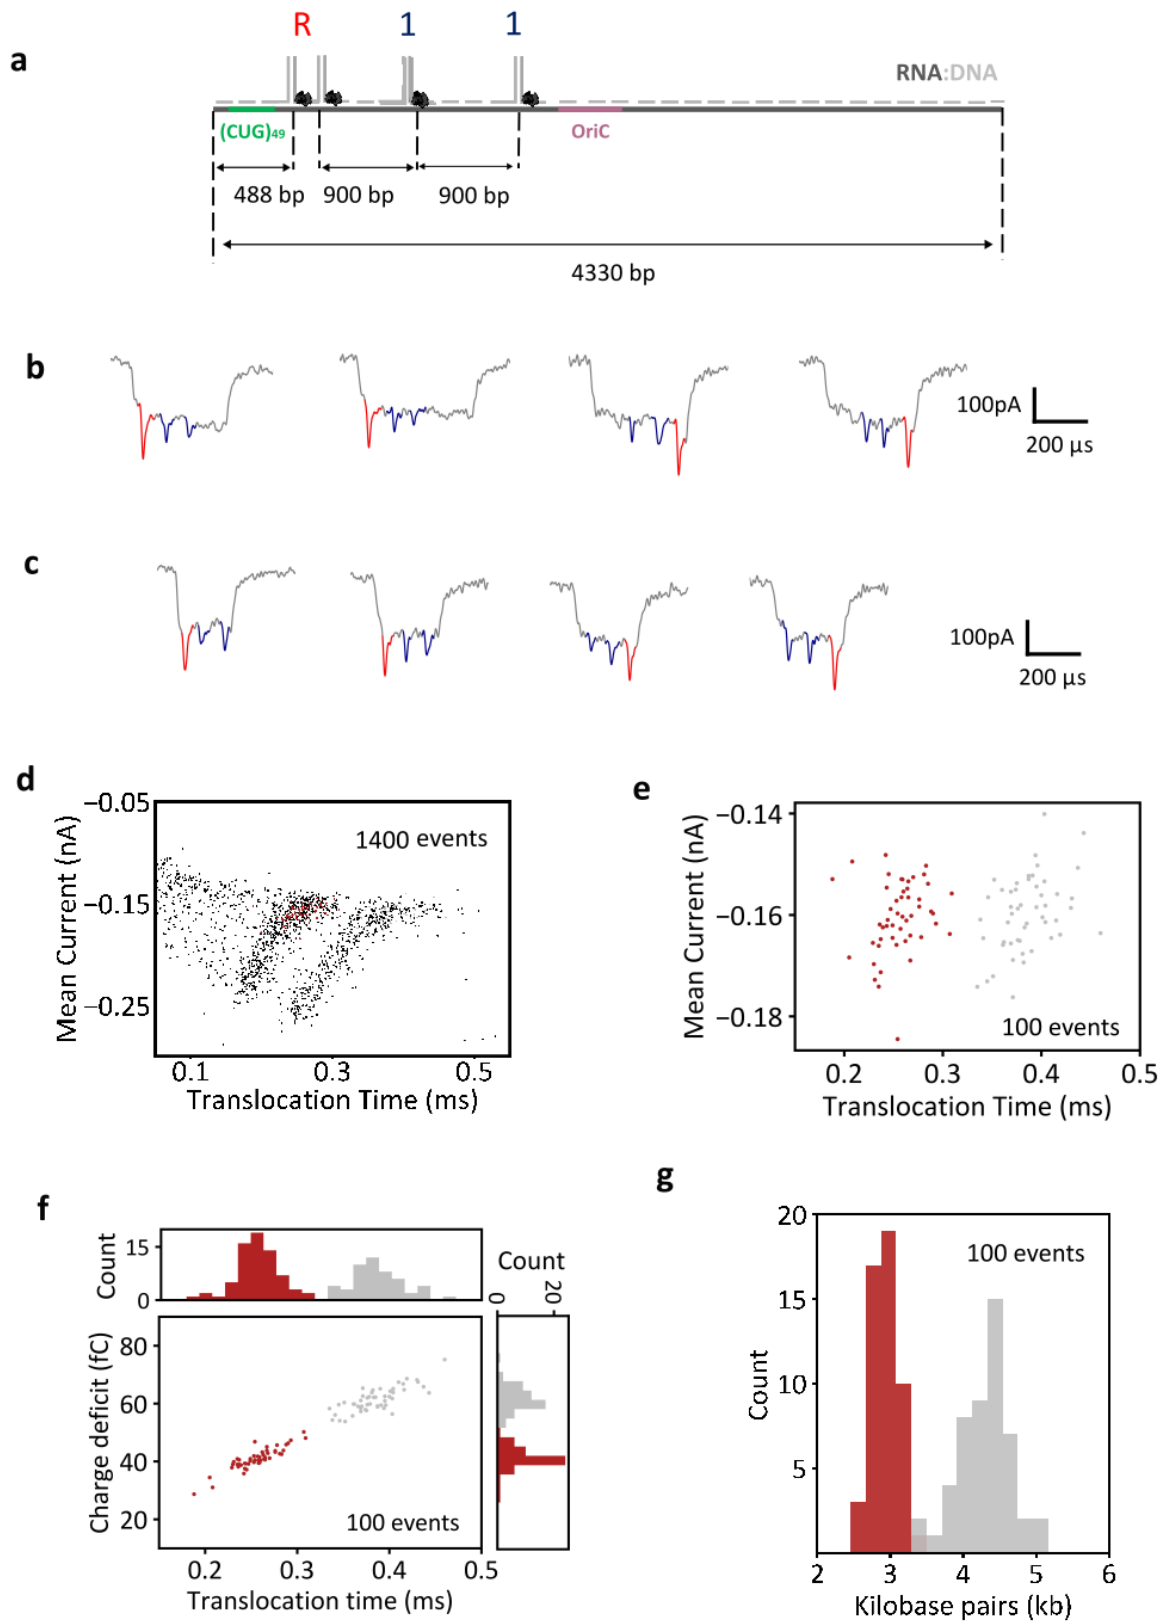

**Supplementary Figure 25:** Single molecule sizing of RNA IDs produced from a 4.5 kbp DNA construct. **a** The sequence of the DNA construct is presented in Supplementary Table 4. The linearized version of the construct (DraIII) is presented Supplementary Figure 22, in lane 11, and the transcription products are shown in lane 12. The RNA ID design includes an ‘R’ label and two ‘1’ bits (Supplementary Table 6). The oligos used for assembly of the hybrid are shown in supplementary Table 6. **b** Exemplary RNA ID translocation events of full-length transcripts (END). **c** Exemplary RNA ID translocation events ascribed to premature termination (PT). **d** Scatter plot of mean current against translocation time shows two distinct distributions, attributed to PT RNA IDs and END RNA IDs (from left to right). **e** Scatter plot of mean current against translocation time of 100 unfolded events. **f** Scatter plot of charge deficit against translocation time for RNA IDs of PT (red) and END (gray) RNA transcripts, which shows the linear dependence of both parameters. **g** Base pair length of molecules converted from translocation time (in f), which shows two distinct distributions. PT distribution has a mean length of  $(2.9 \pm 0.2)$  kbp and END transcripts have a mean length of  $(4.3 \pm 0.3)$  kbp. Errors correspond to standard deviation.



## Supplementary Figure 26.

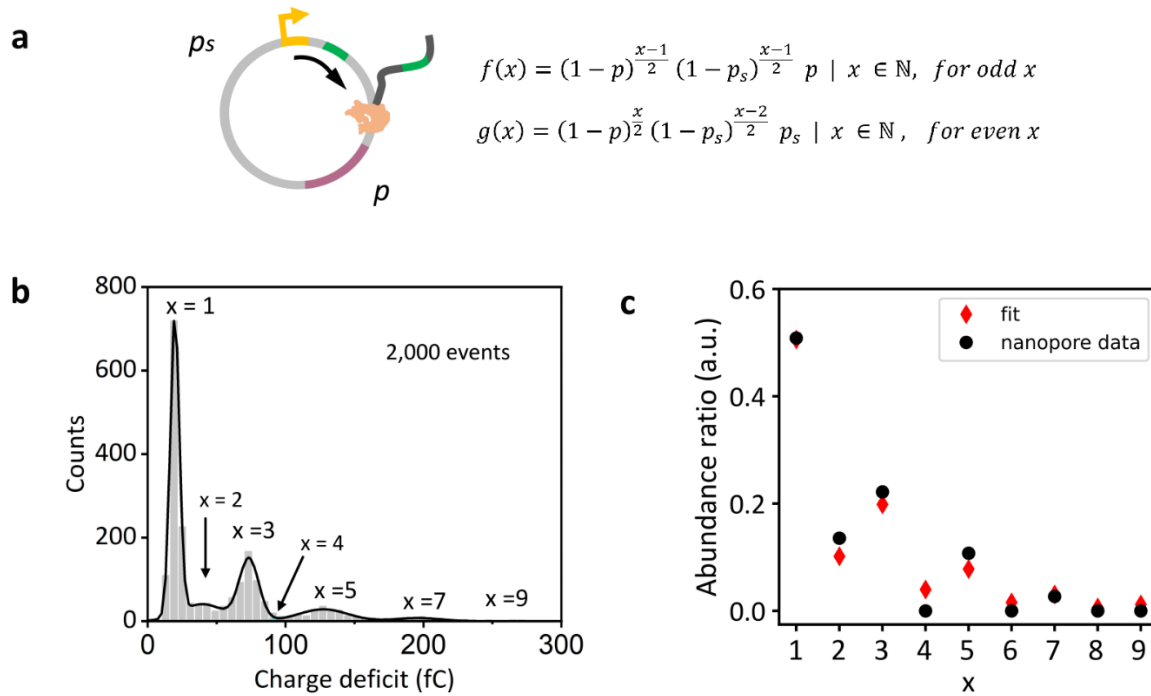

**Supplementary Figure 26:** Quantitative description of T7RNAP processivity and transcription termination. **a** Considering a probability  $p$  of transcription terminating at the identified premature transcription termination site, and a probability  $p_s$  for transcription terminating solely by dissociation of the polymerase at a different region of the plasmid. Equation  $f(x)$  describes the abundance of transcripts originated from premature transcription termination at OriC. Equation  $g(x)$  describes the transcript abundance originated from fall-off of T7RNAP at a different region of the plasmid. **b** The distribution of the charge deficit of nanopore translocation events is presented. The different transcript populations were fitted to gaussian functions, from which the relative abundance of transcripts was derived. The distributions ascribed to premature termination transcripts are labelled with  $x$  values of odd integers ( $x = 1, 3, 5, 7$ ) and the minor distributions ascribed to transcripts produced from T7RNAP dissociation in a different region of the plasmid receive  $x$  values of even integers ( $x = 2, 4, 6, 8$ ). **c** The relative abundance of transcripts (black) are plotted. Fitting of  $f(x)$  and  $g(x)$  is plotted in red,  $p \sim 0.51$  and  $p_s \sim 0.21$ , which agrees with transcription termination reported in linear DNA constructs.

## Supplementary Figure 27.

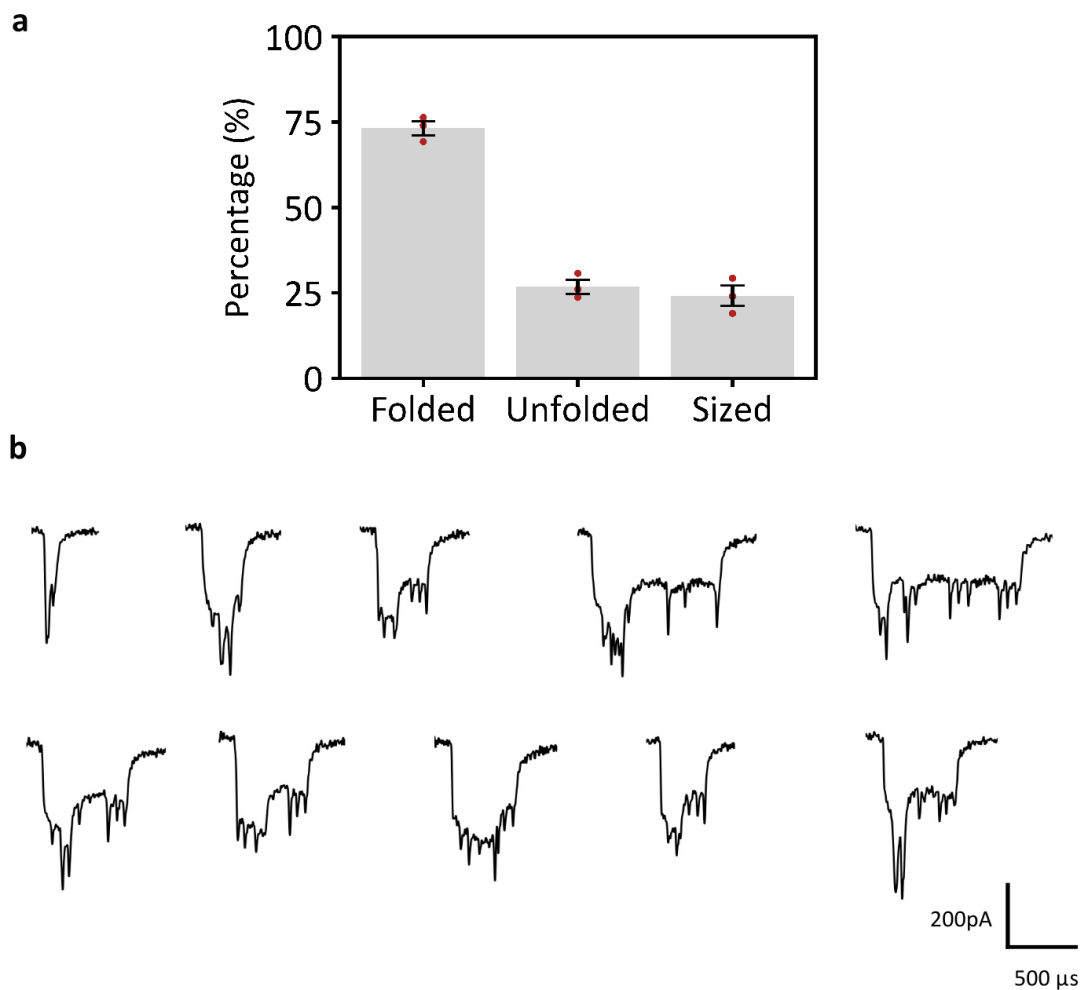

**Supplementary Figure 27:** Percentage of translocation events sized. **a** Shows the percentage of folded, unfolded and sized events. The percentages were computed from 3 different nanopore measurements of RNA IDs produced from transcription of a circular DNA construct. The amount of folded events correspond to  $(73 \pm 2)\%$ , unfolded events constitute  $(27 \pm 2)\%$  of the sample, and  $(24 \pm 3)\%$  were sized. The errors correspond to the standard error of the mean. **b** Exemplary folded events are presented.

## Supplementary Figure 28

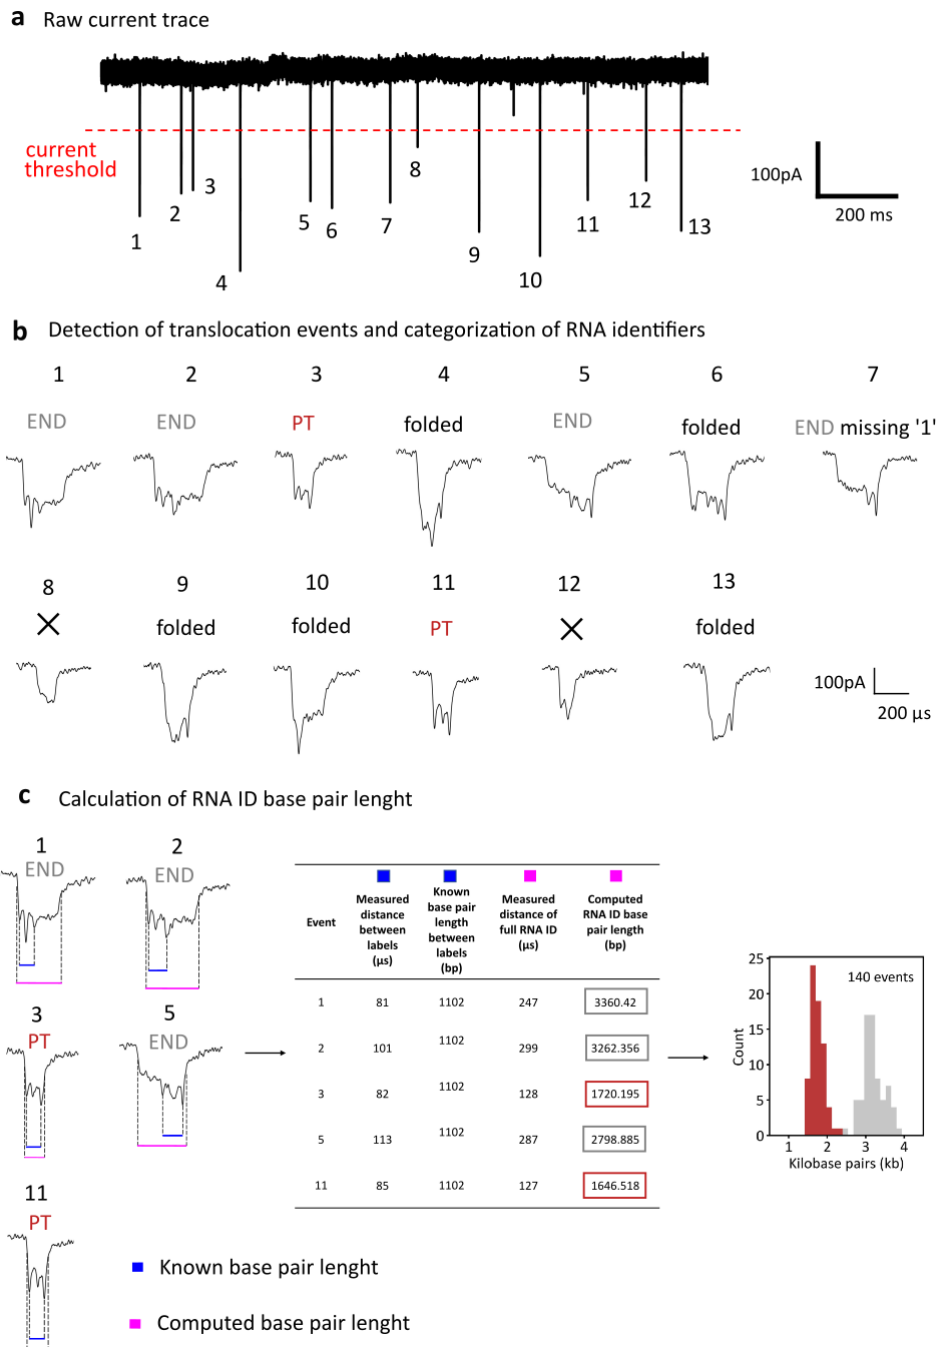

**Supplementary Figure 28:** Step-by-step nanopore data analysis for RNA ID sizing. **a** An exemplary region of the ionic raw current trace is shown. We use a home-built LabVIEW code to identify translocation events by simple thresholding. Events are then analysed by using standard parameters, which include the charge deficit, minimum translocation time and mean current that are given by the length of the RNA ID molecule and its design. **b** The translocation events were then categorized into PT RNA ID, END RNA ID, folded RNA ID and

translocations associated to misfolded molecules (marked X) based on the ionic current trace of the events. **c** The base pair length of PT RNA IDs and END RNA IDs was computed using the RNA ID design. The distance between current spikes (blue) was measured (in time units). This distance corresponds to a known base pair length which was used to calculate a conversion factor. Then, the length in time units of the entire translocation event was measured (pink) and converted into a base. The base pair length was plotted as shown in the right.

## Supplementary Figure 29

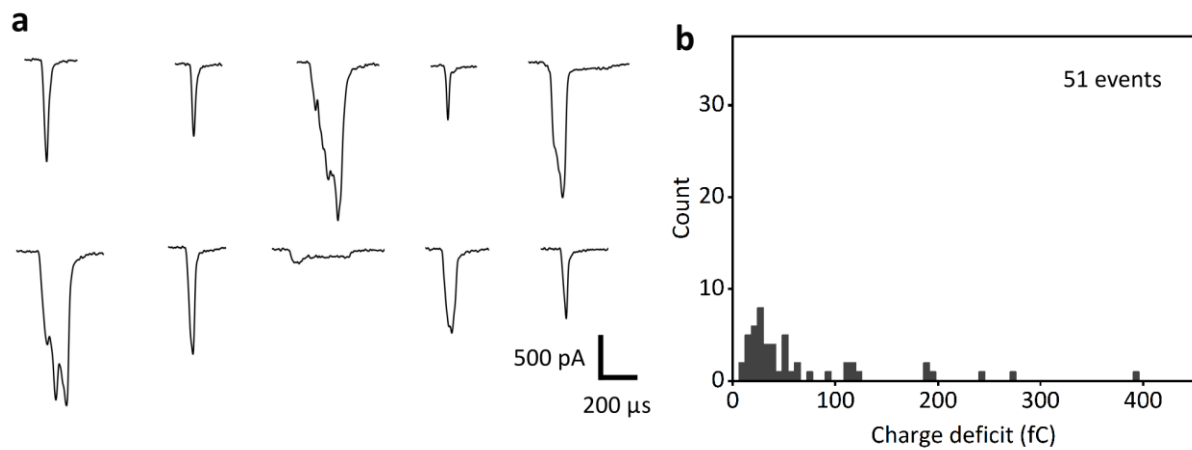

**Supplementary Figure 29:** Characterization of ionic current trace shows that distinctive current traces emanate exclusively from the RNA IDs. **a** A nanopore measurement was performed in the absence of RNA IDs for 90 minutes. Translocation events detected using the following threshold parameters are shown. Minimum charge deficit: 0 fC, maximum charge deficit 400 fC, minimum translocation time: 50 μs, minimum current drop: -100 pA. Ionic current scale bar corresponds to 500 pA, and translocation time scale bar to 200 μs. **b** The charge deficit of the translocations detected are plotted, demonstrating that the current traces studied in this work originate from the translocation of RNA IDs.



CGCTGTAGGTATCTCAGTTCGGTGTAGGTCTGTTTCGCTCCAAGCTGGGCTGTGTGCACGAACCCCC  
 GTTCAGCCCGACCGCTGCGCCTTATCCGGTAACCTATCGTCTTGAGTCCAACCCGGTAAGACACGAC  
 TTATCGCCACTGGCAGCAGCCACTGGTAACAGGATTAGCAGAGCGAGGTATGTAGGCGGTGCTACA  
 GAGTTCCTGAAGTGGTGGCCTAACTACGGCTACACTAGAAGGACAGTATTTGGTATCTGCGCTCTG  
 CTGAAGCCAGTTACCTTCGAAAAAGAGTTGGTAGCTCTTGATCCGGCAAACAAACCACCGCTGGT  
 AGCGGTGGTTTTTTTTGTTTTGCAAGCAGCAGATTACGCGCAGAAAAAAGGATCTCAAAGAAGATCCT  
 TTGATCTTTTTCTACGGGGTCTGACGCTCAGTGGAACGAAAACTCACGTTAAGGGATTTTTGGTCATG  
 AGATTATCAAAAAGGATCTTCACCTAGATCCTTTTAAATTAATAATGAAGTTTTAAATCAATCTAA  
 AGTATATATGAGTAAACTTGGTCTGACAGTTACCAATGCTTAATCAGTGAGGCACCTATCTCAGCG  
 ATCTGTCTATTTTCGTTTCATCCATAGTTGCCTGACTCCCCGTCGTGTAGATAACTACGATACGGGAG  
 GGCTTACCATCTGGCCCCAGTGTGCAATGATACCGCGAGACCCACGCTCACCGGCTCCAGATTTA  
 TCAGCAATAAACCAGCCAGCCGGAAGGGCCGAGCGCAGAAGTGGTCTGCAACTTTATCCGCCTCC  
 ATCCAGTCTATTAATTGTTGCCGGGAAGCTAGAGTAAGTAGTTCGCCAGTTAATAGTTTTCGCAAC  
 GTTGTGCCATTGCTACAGGCATCGTGGTGTACGCTCGTCTGTTTGGTATGGCTTCATTCAGCTCC  
 GGTCCCAACGATCAAGGCGAGTTACATGATCCCCATGTTGTGCAAAAAAGCGGTTAGCTCCTTC  
 GGTCTCCGATCGTTGTGAGAAGTAAGTTGGCCGAGTGTATCACTCATGGTTATGGCAGCACTG  
 CATAATTCTCTTACTGTCATGCCATCCGTAAGATGCTTTTCTGTGACTGGTGAGTACTCAACCAAG  
 TCATTCTGAGAATAGTGTATGCGGCGACCGAGTTGCTCTTGCCCGGCGTCAATACGGGATAATACC  
 GCGCCACATAGCAGAACTTTAAAAGTGTCTCATCATTGGAAAACGTTCTTCGGGGCGAAAACTCTCA  
 AGGATCTTACCGCTGTTGAGATCCAGTTCGATGTAACCCACTCGTGCACCCAACTGATCTTCAGCA  
 TCTTTTACTTTTACCAGCGTTTCTGGGTGAGCAAAAACAGGAAGGCAAAAATGCCGCAAAAAGGGA  
 ATAAGGGCGACACGGAAATGTTGAATACTCATACTCTTCTTTTCAATATTTATTGAAGCATTAT  
 CAGGGTTATTGTCTCATGAGCGGATACATATTTGAATGTATTTAGAAAAATAAACAAATAGGGGTT  
 CCGCGCACATTTCCCGAAAAGTGCCACCTGACGTCTAAGAAACCATTATTATCATGACATTAACC  
 TATAAAAATAGGCGTATCACGAGGCC

Map of the plasmid showing restriction sites, T7RNAP promoter sequence, the OriC and the CTG repeats.

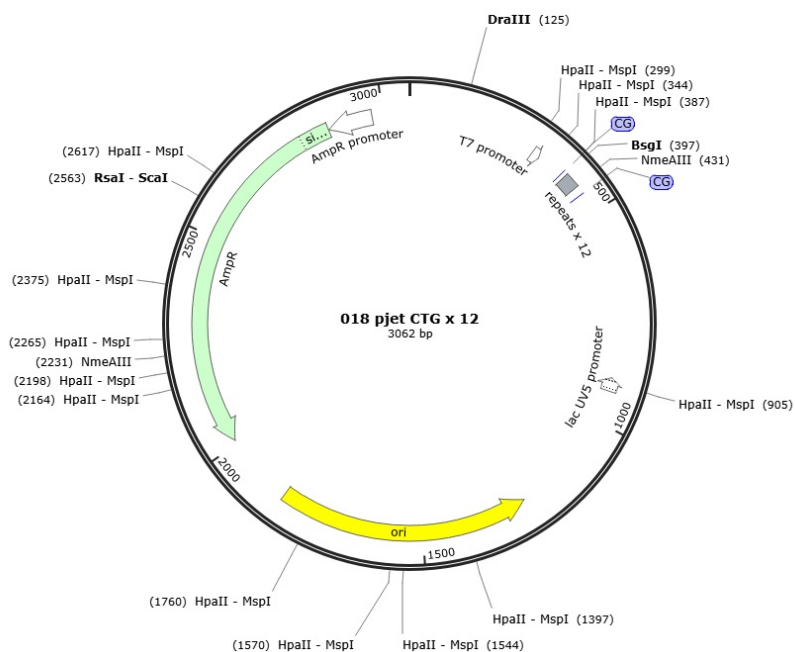

## Supplementary Table 2.

Sequence of oligonucleotides in RNA ID design for characterization of transcripts from linear DNA. This design is used for the study of RNA from premature termination (PT) and RNA from full transcription of the linear template (Figure 1). The oligos are complementary to the region of the circular plasmid (Supplementary Table 1) covering from the promoter to DraIII restriction site.

▲ Complementary DNA oligo

▲ Bit '1' oligo

▲ Repeats label

Table 2

| Oligo number | Sequence (5' → 3')                        |
|--------------|-------------------------------------------|
| 1            | AGCGTGATGCTACTAATTGGGACAATTTTCCAGATGAAGT  |
| 2            | ATCATCTAAGAATTTAAATGAAGAAGACTTCAGAGCTTTT  |
| 3            | GTAAAAAATTATTTGGCAAAAATAATATAATTCCGGCTGCA |
| 4            | GGGGCGGCCTCGTGATACGCCTATTTTTATAGGTTAATGT  |
| 5            | CATGATAATAATGGTTTCTTAGACGTCAGGTGGCACTTTT  |
| 6            | CGGGGAAATGTGCGCGGAACCCCTATTTGTTTATTTTTCT  |
| 7            | AAATACATTCAAATATGTATCCGCTCATGAGACAATAACC  |
| 8            | CTGATAAATGCTTCAATAATATTGAAAAAGGAAGAGTATG  |
| 9            | AGTATTCAACATTTCCGTGTCGCCCTTATTCCCTTTTTTG  |
| 10           | CGGCATTTTGCCTTCCTGTTTTTGCTCACCCAGAAACGCT  |
| 11           | GGTAAAAGTAAAAGATGCTGAAGATC                |
| 12           | AGTTGGGTGCACGAGTGGGTTACATCG               |
| 13           | AACTGGATCTCAACAGCGGTAAGAT                 |
| 14           | CCTTGAGAGTTTTCGCCCCGAAGAACGTTTTCCAATGATG  |
| 15           | AGCACTTTTAAAGTTCTGCTATGTGGCGCGGTATTATCCC  |
| 16           | GTATTGACGCCGGGCAAGAGCAACTCGGTCGCCGCATACA  |
| 17           | CTATTCTCAGAATGACTTGGTTGAGTACTCACCAGTCACA  |
| 18           | GAAAAGCATCTTACGGATGGCATGACAGTAAGAGAATTAT  |
| 19           | GCAGTGCTGCCATAACCATGAGTGATAAACTGCGGCCAA   |
| 20           | CTTACTTCTGACAACGATCGGAGGACCGAAGGAGCTAACC  |
| 21           | GCTTTTTTGCACAACATGGGGGATCATGTAACCTCGCCTTG |
| 22           | ATCGTTGGGAACCGGAGCTGAATGAAGCCATAACCAACGA  |
| 23           | CGAGCGTGACACCACGATGCCTGTAGCAATGGCAACAACG  |
| 24           | TTGCGCAAACATTAACCTGGCGAACTACTTACTCTAGCTT  |
| 25           | CCCGGCAACAATTAATAGACTGGATGGAGGCGGATAAAGT  |
| 26           | TGCAGGACCACTTCTGCGCTCGGCCCTTCCGGCTGGCTGG  |
| 27           | TTTATTGCTGATAAATCTGGAGCCGGT               |
| 28           | GAGCGTGGGTCTCGCGGTATCATTGCAG              |



|    |                                                   |
|----|---------------------------------------------------|
| 29 | CACTGGGGCCAGATGGTAAGCCCTC                         |
| 30 | CCGTATCGTAGTTATCTACACGACGGGGAGTCAGGCAACT          |
| 31 | ATGGATGAACGAAATAGACAGATCGCTGAGATAGGTGCCT          |
| 32 | CACTGATTAAGCATTGGTAACTGTCAGACCAAGTTTACTC          |
| 33 | ATATATACTTTAGATTGATTTAAAACCTTCATTTTAAATTT         |
| 34 | AAAAGGATCTAGGTGAAGATCCTTTTTGATAATCTCATGA          |
| 35 | CCAAAATCCCTTAACGTGAGTTTTTCGTTCCACTGAGCGTC         |
| 36 | AGACCCCGTAGAAAAGATCAAAGGATCTTCTTGAGATCCT          |
| 37 | TTTTTCTGCGCGTAATCTGCTGCTTGCAAACAAAAAAC            |
| 38 | CACCGCTACCAGCGGTGGTTTGTGTTGCCGGATCAAGAGCT         |
| 39 | ACCAACTCTTTTTCCGAAGGTAAGTGGCTTCAGCAGAGCG          |
| 40 | CAGATACCAAATACTGTCCTTCTAGTGTAGCCGTAGTTAG          |
| 41 | GCCACCACTTCAAGAACTCTGTAGCACCGCCTACATACCT          |
| 42 | CGCTCTGCTAATCCTGTTACCAGTGGCTGCTGCCAGTGGC          |
| 43 | GATAAGTCGTGTCTTACCGGGTTGGAC                       |
| 44 | TCAAGACGATAGTTACCGGATAAGGCGC                      |
| 45 | AGCGGTCTGGGCTGAACGGGGGGTTCTTTGGATATCACTCATTAGTGGT |
| 46 | GTGCACACAGCCCAGCTTGGAGCGAACGACCTACACCGAA          |
| 47 | CTGAGATACCTACAGCGTGAGCTATGAGAAAGCGCCACGC          |
| 48 | TTCCCGAAGGGAGAAAGGCGGACAGGTATCCGGTAAGCGG          |
| 49 | CAGGGTCTGGAACAGGAGAGCGCACGAGGGAGCTTCCAGGG         |
| 50 | GGAAACGCCTGGTATCTTTATAGTCTGTGCGGGTTTCGCC          |
| 51 | ACCTCTGACTTGAGCGTCGATTTTTGTGATGCTCGTCAGG          |
| 52 | GGGGCGGAGCCTATGGAAAAACGCCAGCAACGCGGCCTTT          |
| 53 | TTACGGTTCCTGGCCTTTTGCTGGCCTTTTGCTCACATGT          |
| 54 | TCTTTCCTGCGTTATCCCCTGATTCTGTGGATAACCGTAT          |
| 55 | TACCGCCTTTGAGTGAGCTGATACCGCTCGCCGCAGCCGA          |
| 56 | ACGACCGAGCGCAGCGAGTCAGTGAGCGAGGAAGCGGAAG          |
| 57 | AGCGCCAATACGCAAACCGCCTCTCCCCGCGCTTGGCC            |
| 58 | GATTCATTAATGCAGCTGGCACGACAGGTTTCCCGACTGG          |
| 59 | AAAGCAATTGGCAGTGAGCGCAACGCA                       |
| 60 | ATTAATGTGAGTTAGCTCACTCATTAGG                      |
| 61 | CACCCCAGGCTTTACACTTTATGCTTTTGGATATCACTCATTAGTGGT  |
| 62 | TCCGGCTCGTATAATGTGTGGAATTATGAGCGGATAATAA          |
| 63 | TTTCACACAGGAGGTTTAACTTTAAACATGTCAAAGAG            |
| 64 | ACGTCTTTTGTAAAGAAATGCTGAGGAACTTGCAAAGCAA          |
| 65 | AAATGGATGCTATTAACCCTGAACTTTCTTCAAATTTAA           |
| 66 | ATTTTTAATAAAATTCCTGTCTCAGTTTCTTGAAGCTTGC          |
| 67 | TCTAAACCTCGTTCAAAAAAATGCAGAATAAAGTTGGTC           |
| 68 | AAGAGGAACATATTGAATATTTAGCTCGTAGTTTTTCATGA         |
| 69 | GAGTCGATTGCCAAGAAAACCCACGCCACCTACAACGGTT          |
| 70 | CCTGATGAGGTGGTTAGCATAGTTCTTAATATAAGTTTTA          |
| 71 | ATATACAGCCTGAAAATCTTGAGAGAATAAAGAAGAACA           |
| 72 | TCGATTTTCCATGGCAGCTGAGAATATTGTAGGAGATCTT          |
| 73 | CTAGAAAGATTTAAGCCGAGAATGGTCTGTGATCCCCC            |
| 74 | CATTCCCGGCTACACTGCACCATGATCTTGCTGAAAAACT          |

|    |                                                                  |
|----|------------------------------------------------------------------|
| 75 | CGAGCCATCCGGAAGATCTGGCGGCCGCTCTCCC                               |
| 76 | CAGCAGCAGCAGCAGCAGCAGCAGCAGCAGTTTGGATATCACTCATTAGTGGT/3'-biotin/ |

### Supplementary Table 3.

Sequence of oligonucleotides in RNA ID design for characterization of transcripts from circular DNA. This design is used for the study of RNA IDs from multiple transcription cycles (Figure 3). The oligos are complementary to the entire circular plasmid (Supplementary Table 1). This table includes the same oligonucleotides as Table 2, however it contains 5 extra oligonucleotides (76, 77, 78, 79, 80) which are complementary to the region extending from DraIII restriction site to the T7RNAP promoter.

▲ Complementary DNA oligo

▲ Bit '1' oligo

▲ Repeats label

Table 3

| Oligo number | Sequence (5' → 3')                         |
|--------------|--------------------------------------------|
| 1            | AGCGTGATGCTACTAATTGGGACAATTTCCAGATGAAGT    |
| 2            | ATCATCTAAGAATTTAAATGAAGAAGACTTCAGAGCTTTT   |
| 3            | GTTAAAAATTATTTGGCAAAAATAATATAATTCGGCTGCA   |
| 4            | GGGGCGGCCTCGTGATACGCCTATTTTTATAGGTTAATGT   |
| 5            | CATGATAATAATGGTTTCTTAGACGTCAGGTGGCACTTTT   |
| 6            | CGGGGAAATGTGCGCGGAACCCCTATTTGTTTATTTTTCT   |
| 7            | AAATACATTCAAATATGTATCCGCTCATGAGACAATAACC   |
| 8            | CTGATAAATGCTTCAATAATATTGAAAAAGGAAGAGTATG   |
| 9            | AGTATTCAACATTTCCGTGTCGCCCTTATTCCCTTTTTTG   |
| 10           | CGGCATTTTGCCTTCCTGTTTTTTGCTCACCCAGAAACGCT  |
| 11           | GGTGAAAGTAAAAGATGCTGAAGATC                 |
| 12           | AGTTGGGTGCACGAGTGGGTTACATCG                |
| 13           | AACTGGATCTCAACAGCGGTAAGAT                  |
| 14           | CCTTGAGAGTTTTTCGCCCGAAGAACGTTTTTCCAATGATG  |
| 15           | AGCACTTTTAAAGTTCTGCTATGTGGCGCGGTATTATCCC   |
| 16           | GTATTGACGCCGGGCAAGAGCAACTCGGTGCGCCGATACA   |
| 17           | CTATTCTCAGAATGACTTGGTTGAGTACTCACCAGTCACA   |
| 18           | GAAAAGCATCTTACGGATGGCATGACAGTAAGAGAATTAT   |
| 19           | GCAGTGCTGCCATAACCATGAGTGATAAACTGCGGCCAA    |
| 20           | CTTACTTCTGACAACGATCGGAGGACCGAAGGAGCTAACC   |
| 21           | GCTTTTTTGCACAACATGGGGGATCATGTAACCTCGCCTTG  |
| 22           | ATCGTTGGGAACCGGAGCTGAATGAAGCCATAACCAACGA   |
| 23           | CGAGCGTGACACCACGATGCCTGTAGCAATGGCAACAACG   |
| 24           | TTGCGCAAAC TATTA ACTGGCGAACTACTTACTCTAGCTT |
| 25           | CCCGGCAACAATTAATAGACTGGATGGAGGCGGATAAAGT   |
| 26           | TGCAGGACCACTTCTGCGCTCGGCCCTTCCGGCTGGCTGG   |
| 27           | TTTATTGCTGATAAATCTGGAGCCGGT                |

|    |                                                   |
|----|---------------------------------------------------|
| 28 | GAGCGTGGGTCTCGCGGTATCATTGCAG                      |
| 29 | CACTGGGGCCAGATGGTAAGCCCTC                         |
| 30 | CCGTATCGTAGTTATCTACACGACGGGGAGTCAGGCAACT          |
| 31 | ATGGATGAACGAAATAGACAGATCGCTGAGATAGGTGCCT          |
| 32 | CACTGATTAAGCATTGGTAAGTGTGACACCAAGTTTACTC          |
| 33 | ATATATACTTTAGATTGATTTAAAACCTCATTTTTAATTT          |
| 34 | AAAAGGATCTAGGTGAAGATCCTTTTTGATAATCTCATGA          |
| 35 | CCAAAATCCCTTAACGTGAGTTTTTCGTTCCACTGAGCGTC         |
| 36 | AGACCCCGTAGAAAAGATCAAAGGATCTTCTTGAGATCCT          |
| 37 | TTTTTTCTGCGCGTAATCTGCTGCTTGCAAACAAAAAAC           |
| 38 | CACCGCTACCAGCGGTGGTTTTGTTTGCCGGATCAAGAGCT         |
| 39 | ACCAACTCTTTTTCCGAAGGTAAGTGGCTTCAGCAGAGCG          |
| 40 | CAGATACCAAATACTGTCCTTCTAGTGTAGCCGTAGTTAG          |
| 41 | GCCACCACTTCAAGAACTCTGTAGCACCGCCTACATACCT          |
| 42 | CGCTCTGCTAATCCTGTTACCAGTGGCTGCTGCCAGTGGC          |
| 43 | GATAAGTCGTGTCTTACCGGGTTGGAC                       |
| 44 | TCAAGACGATAGTTACCGGATAAGGCGC                      |
| 45 | AGCGGTCTGGGCTGAACGGGGGGTTCTTTGGATATCACTCATTAGTGGT |
| 46 | GTGCACACAGCCCAGCTTGGAGCGAACGACCTACACCGAA          |
| 47 | CTGAGATACCTACAGCGTGAGCTATGAGAAAGCGCCACGC          |
| 48 | TTCCCGAAGGGAGAAAAGGCGGACAGGTATCCGGTAAGCGG         |
| 49 | CAGGGTCGGAACAGGAGAGCGCACGAGGGAGCTTCCAGGG          |
| 50 | GGAAACGCCTGGTATCTTTATAGTCTGTGCGGGTTTCGCC          |
| 51 | ACCTCTGACTTGAGCGTCGATTTTTGTGATGCTCGTCAGG          |
| 52 | GGGGCGGAGCCTATGGAAAAACGCCAGCAACGCGGCCTTT          |
| 53 | TTACGGTTCCTGGCCTTTTGCTGGCCTTTTGCTCACATGT          |
| 54 | TCTTTCCCTGCGTTATCCCCTGATTCTGTGGATAACCGTAT         |
| 55 | TACCGCCTTTGAGTGAGCTGATACCGCTCGCCGCAGCCGA          |
| 56 | ACGACCGAGCGCAGCGAGTCAGTGAGCGAGGAAGCGGAAG          |
| 57 | AGCGCCCAATACGCAAACCGCCTCTCCCCGCGCGTTGGCC          |
| 58 | GATTCATTAATGCAGCTGGCACGACAGGTTTCCCGACTGG          |
| 59 | AAAGCAATTGGCAGTGAGCGCAACGCA                       |
| 60 | ATTAATGTGAGTTAGCTCACTCATTAGG                      |
| 61 | CACCCCAGGCTTTACACTTTATGCTTTTGGATATCACTCATTAGTGGT  |
| 62 | TCCGGCTCGTATAATGTGTGGAATTATGAGCGGATAATAA          |
| 63 | TTTCACACAGGAGGTTTAAACTTTAAACATGTCAAAAAGAG         |
| 64 | ACGTCTTTTGTTAAGAATGCTGAGGAACTTGCAAAGCAA           |
| 65 | AAATGGATGCTATTAACCCTGAACTTTCTTCAAAAATTTAA         |
| 66 | ATTTTTAATAAAATTCCTGTCTCAGTTTCTTGAAGCTTGC          |
| 67 | TCTAAACCTCGTTCAAAAAAATGCAGAATAAAGTTGGTC           |
| 68 | AAGAGGAACATATTGAATATTTAGCTCGTAGTTTTTCATGA         |
| 69 | GAGTCGATTGCCAAGAAAACCCACGCCACCTACAACGGTT          |
| 70 | CCTGATGAGGTGGTTAGCATAGTTCTTAATATAAGTTTTA          |
| 71 | ATATACAGCCTGAAAATCTTGAGAGAATAAAAAGAAGAACA         |
| 72 | TCGATTTTCCATGGCAGCTGAGAATATTGTAGGAGATCTT          |
| 73 | CTAGAAAAGATTTAAGCCGAGAATGGTCTGTGATCCCCC           |

|           |                                                                     |
|-----------|---------------------------------------------------------------------|
| <b>74</b> | CATTCCCGGCTACACTGCACCATGATCTTGCTGAAAAACT                            |
| <b>75</b> | CGAGCCATCCGGAAGATCTGGCGGCCGCTCTCCC                                  |
| <b>76</b> | TATAGTGAGTCGTATTACGCCGGATGGATATGGTGTTT                              |
| <b>77</b> | AGGCACAAGTGTTAAAGCAGTTGATTTTATTCACTATG                              |
| <b>78</b> | ATGAAAAAACAATGAATGGAACCTGCTCCAAGTTA                                 |
| <b>79</b> | AAAATAGAGATAATACCGAAAACATCGAGTAGTA                                  |
| <b>80</b> | AGATTAGAGATAATACAACAATAAAAAAATGGTTTAGAACTTACTCACAGC                 |
| <b>81</b> | CAGCAGCAGCAGCAGCAGCAGCAGCAGCAGCAGTTTGGATATCACTCATTAGTGGT/3'-biotin/ |

### Supplementary Table 4.

Sequence of modified pJET1.2/blunt cloning vector (CloneJET PCR Cloning Kit, Thermo Fisher, Catalog number: K1231): Circular DNA (4527 bp) with inserted (CTG)<sub>49</sub> tandem repeats. The sequence of the plasmid was verified by whole plasmid sequencing. Map of the plasmid is included at the end of the table.

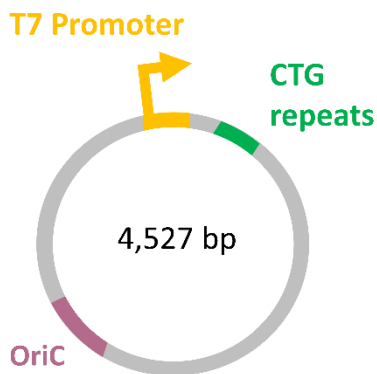

Table 4

| Sequence (5' → 3')                                                                                                                                                                                                                                                                                                                                                                                                                                                                                                                                                                                                                                                                                                                                                                                                                                                                                                                                                                                                                                                                                                                                                                                                                                                                                                                                                                                                                                                                                                  |                             |      |                |
|---------------------------------------------------------------------------------------------------------------------------------------------------------------------------------------------------------------------------------------------------------------------------------------------------------------------------------------------------------------------------------------------------------------------------------------------------------------------------------------------------------------------------------------------------------------------------------------------------------------------------------------------------------------------------------------------------------------------------------------------------------------------------------------------------------------------------------------------------------------------------------------------------------------------------------------------------------------------------------------------------------------------------------------------------------------------------------------------------------------------------------------------------------------------------------------------------------------------------------------------------------------------------------------------------------------------------------------------------------------------------------------------------------------------------------------------------------------------------------------------------------------------|-----------------------------|------|----------------|
| T7 promoter                                                                                                                                                                                                                                                                                                                                                                                                                                                                                                                                                                                                                                                                                                                                                                                                                                                                                                                                                                                                                                                                                                                                                                                                                                                                                                                                                                                                                                                                                                         | (CTG) <sub>49</sub> repeats | OriC | DraIII Cutting |
| GCATCCATTTTTTGGCTTTGCAAGTTCCTCAGCATTCTTAACAAAAGACGTCTCTTTTGACATGTTT<br>AAAGTTTAAACCTCCTGTGTGAAATTATTATCCGCTCATAATTCCACACATTATACTGAGAGATCC<br>CCTCATAATTTCCCAAAGCGTAACCATGTGTGAATAAATTTTGAGCTAGTAGGGTTGCAGCCACG<br>AGTAAGTCTTCCCTTGTATTGTGTAGCCAGAATGCCGCAAACTTCCATGCCTAAGCGAACTGTT<br>GAGAGTACGTTTTCGATTTCTGACTGTGTTAGCCTGGAAGTGCTTGTCCCAACCTTGTTCCTGAGCA<br>TGAACGCCCCGCAAGCCAACATGTTAGTTGAAGCATCAGGGCGATTAGCAGCATGATATCAAAACGC<br>TCTGAGCTGCTCGTTCGGCTATGGCGTAGGCCTAGTCCGTAGGCAGGACTTTTCAAGTCTCGGAAG<br>GTTCTTCAATCTGCATTTCGCTTCGAATAGATATTAACAAGTTGTTTGGGTGTTTCAATTTCAACA<br>GGTAAGTTAGTTGCTAGAACCCATGGCTCCTTTGCCGACGCTGAGTAGATTTTAGGTGACGGGTGG<br>TGACAATGAGTCCGTGTCGAGCGCTGATTTTTTTCGGCCTTTAGAGCGAGATTTATACAATAGAATT<br>TGGCATGAGATTGGATTGCTTTTAGTCAGCCTCTTATAGCCTAAAGTCTTTGAGTGACTAGATGAC<br>ATATCATGTAAGTTGCTGATAGTTTCCAGTTTTTCCGCTCCTAGGTCTGCATATTGTACTTTTCC<br>TCTTACTCGACTTAACCAGTACCAACCAGCTTCTCAACGGATTTATACCATGGCACTTTAAAGCC<br>AGCATCACTGACAATGAGCGGTGTGGTGTACTCGGTAGAAATGCTCGCAAGGTCGGCTAGAAATTG<br>GTCATGAGCTTTCTTTGAACATTGCTCTGAAAGCGGGAACGCTTTCTCATAAAGAGTAACAGAACG<br>ACCGTGTAGTGCGACTGAAGCTCGCAATACCATAAGTCGTTTTTGTCTACGAATATCAGACCAGTC<br>AACAGTACAATGGGCATCGTATTGCCCGAACAGATAAAGCTAGCATGCCAACGGTATACAGCGAG<br>TCGCTCTTTGTGGAGGTGACGATTACCTAACAATCGGTTCGATTCGTTTGTATGTTTGTCT<br>CGCTTTGGTTGGCAGGTTACGGCCAAGTTCCGGTAAGAGTGAGAGTTTTACAGTCAAGTAATGCGTG<br>GCAAGCCAACGTTAAGCTGTTGAGTCGTTTTAAGTGTAATTCGGGGCAGAATTGGTAAAGAGAGTC<br>GTGTAAAATATCGAGTTCGCACATCTTGTGTCTGATTATTGATTTTTTCGCGAAACCATTGATCA |                             |      |                |



Map of the plasmid showing restriction sites, T7RNAP promoter sequence, the OriC and the CTG repeats.

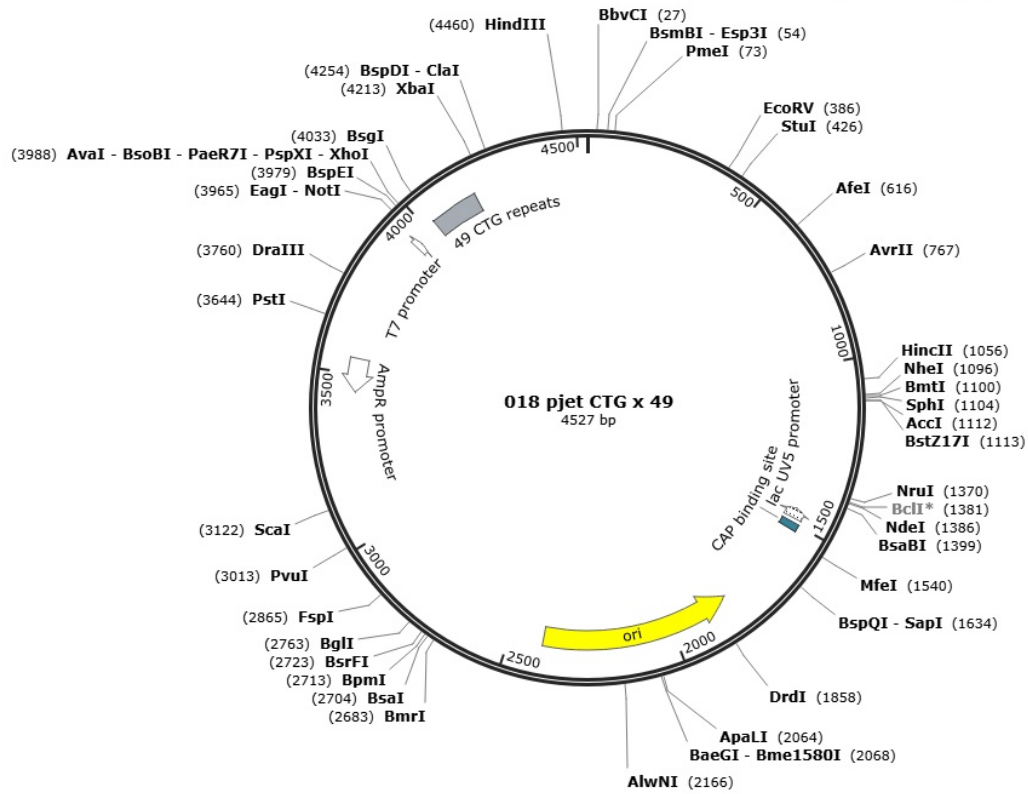



### Supplementary Table 5.

PFGG plasmid. The plasmid was produced by IDT and verified using next-generation sequencing and Sanger sequencing.

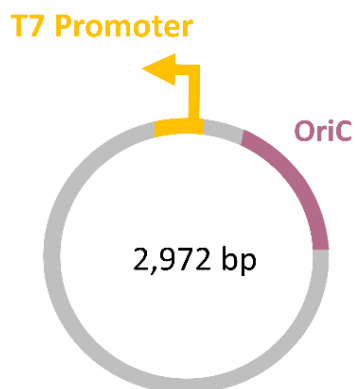

Table 5

| Sequence (5' → 3')                                                                                                                                                                                                                                                                                                                                                                                                                                                                                                                                                                                                                                                                                                                                                                                                                                                                                                                                                                                                                                                                                                                                                                                                                                                                                                                                                                                                                                                                                                                                                                                                                                                                                                                                                                                                                                                                                                                                                                                                         |      |              |
|----------------------------------------------------------------------------------------------------------------------------------------------------------------------------------------------------------------------------------------------------------------------------------------------------------------------------------------------------------------------------------------------------------------------------------------------------------------------------------------------------------------------------------------------------------------------------------------------------------------------------------------------------------------------------------------------------------------------------------------------------------------------------------------------------------------------------------------------------------------------------------------------------------------------------------------------------------------------------------------------------------------------------------------------------------------------------------------------------------------------------------------------------------------------------------------------------------------------------------------------------------------------------------------------------------------------------------------------------------------------------------------------------------------------------------------------------------------------------------------------------------------------------------------------------------------------------------------------------------------------------------------------------------------------------------------------------------------------------------------------------------------------------------------------------------------------------------------------------------------------------------------------------------------------------------------------------------------------------------------------------------------------------|------|--------------|
| T7 promoter                                                                                                                                                                                                                                                                                                                                                                                                                                                                                                                                                                                                                                                                                                                                                                                                                                                                                                                                                                                                                                                                                                                                                                                                                                                                                                                                                                                                                                                                                                                                                                                                                                                                                                                                                                                                                                                                                                                                                                                                                | OriC | ScaI cutting |
| <p>TCGCGCGTTTCGGTGATGACGGTGAAAACCTCTGACACATGCAGCTCCCCTAGACGGTCACAGCTT<br/>           GTCTGTAAGCGGATGCCGGGAGCAGACAAGCCCGTCAGGGCGCGTCAGCGGGTGTGGCGGGTGTC<br/>           GGGGCTGGCTTAACTATGCGGCATCAGAGCAGATTGTACTGAGAGTGCACCAAATGCGGTGTGAAA<br/>           TACCGCACAGATGCGTAAGGAGAAAATACCGCATCAGGCGCCATTCGCCATTCAGGCTGCGCAACT<br/>           GTTGGGAAGGGCGATCGGTGCGGGCCTCATCGCTATTACGCCAGCTGGCGAAAGGGGGATGTGCTG<br/>           CAAGGCGATTAAGTTGGGTAACGCCAGGGTTTTCCAGTCACGACGTTGTAAAACGACGGCCAGTG<br/>           CAACGCGATGACGATGGATAGCGATTCATCGATGAGCTGACCCGATCGCCGCCCGGGAGGGTTGC<br/>           GTTTGAGACAGGCGACAGATCCTGCAGGAAGGTTTAAACGCATTTAGGTGACACTATAGAAGTGGA<br/>           ATCCGCTCGAGGGATCCGAATTCGAAGCTTTGGTACAATTCGAGACCGGAGCGAGACGGGAGTCCA<br/>           GATCTCCATCGTCTCACCATGGTCTCAAGCTACCTGAAGCTTTCTTAATTAAGACGTCAGAATTCT<br/>           CGAGGCGGCCGCATGTGAGTCTC<b>CCTATAGTGAGTCGTATTA</b>ATCAGTTCTGGACCAGCGAGCTGT<br/>           GCTGCGACTCGTGGCGTAATCATGGTCATAGCTGTTTTCCCTGTGTGAAATGTTATCCGCTCACAAT<br/>           TCCACACAACATACGAGCCGGAAGCATAAAGTGTAAGCCTGGGGTGCCTAATGAGTGAGCTAACT<br/>           CACATTAATTGCGTTGCGCTCACTGCCCCTTTCCAGTCGGGAAACCTGTCGTGCCAGCTGCATTA<br/>           ATGAATCGGCCAACGCGCGGGGAGAGGCGGTTTGCATTTGGGCGCTCTTCCGCTTCCCTCGCTCAC<br/>           TGAATCGCTGCGCTCGGTTCGCTGCGGCGAGCGGTATCAGCTCACTCAAAGGCGGTAATACG<br/>           GTTATCCACAGAATCAGGGGATAACGCAGGAAAGAACATGTGAGCAAAAGGCCAGCAAAAGGCCAG<br/>           GAACCGTAAAAAGGCCGCGTTGCTGGCGTT<b>TTTCCATAGGCTCCGCCCCCTGACGAGCATCACAA</b><br/> <b>AAATCGACGCTCAAGTCAGAGGTGGCGAAACCCGACAGGACTATAAAGATACCAGGCGTTTCCCCC</b><br/> <b>TGGAAGCTCCCTCGTGCCTCTCCTGTTCCGACCCTGTGCTTACCGGATACCTGTCCGC</b><b>TTTCT</b><br/> <b>CCCTTCGGGAAGCGTGGCGCTTTCTCATAGCTCAGCTGTAGGTATCTCAGTTCGGTGTAGGTGCT</b><br/> <b>TCGCTCCAAGCTGGGCTGTGTGCACGAACCCCCGTTACGCCGACCGCTGCGCCTTATCCGGTAA</b><br/> <b>CTATCGTCTTGAGTCCAACCCGGTAAGACACGACTTATCGCCACTGGCAGCAGCCACTGGTAACAG</b><br/> <b>GATTAGCAGAGCGAGGTATGTAGGCGGTGCTACAGAGTCTTGAAGTGGTGGCCTAACTACGGCTA</b></p> |      |              |

CACTAGAAGAACAGTATTTGGTATCTGCGCTCTGCTGAAGCCAGTTACCTTCGGAAAAAGAGTTGG  
 TAGCTCTTGATCCGGCAAACAACCACCGCTGGTAGCGGTGGTTTTTTTTGTTTGAAGCAGCAGAT  
 TACGCGCAGAAAAAAGGATCTCAA GAAGATCCTTTGATCTTTTCTACGGGGTCTGACGCTCAGTG  
 GAACGAAAACCTCACGTTAAGGGATTTTGGTCATGAGATTATCAAAAAGGATCTTCACCTAGATCCT  
 TTTAAATTA AAAATGAAGTTTTAAATCAATCTAAAGTATATATGAGTAAACTTGGTCTGACAGTTA  
 CCAATGCTTAATCAGTGAGGCACCTATCTCAGCGATCTGTCTATTTTCGTTTCATCCATAGTTGCCTG  
 ACTCCCCGTCGTGTAGATAACTACGATACGGGAGGGCTTACCATCTGGCCCCAGTGCTGCAATGAT  
 ACCGCGAGATCCACGCTCACCGGCTCCAGATTTATCAGCAATAAACCAGCCAGCCGGAAGGGCCGA  
 GCGCAGAAGTGGTCCTGCAACTTTATCCGCCTCCATCCAGTCTATTAATTGTTGCCGGGAAGCTAG  
 AGTAAGTAGTTTCGCCAGTTAATAGTTTTCGCGCAACGTTGTTGCCATTGCTACAGGCATCGTGGTGTG  
 ACGCTCGTCGTTTGGTATGGCTTCATTCAGCTCCGGTTCCTCAACGATCAAGGCGAGTTACATGATC  
 CCCCATGTTGTGCAAAAAAGCGGTTAGCTCCTTCGGTCTCCGATCGTTGTCAGAAGTAAGTTGGC  
 CGCAGTGTATCACTCATGGTTATGGCAGCACTGCATAATTCTCTTACTGTCATGCCATCCGTAAG  
 ATGCTTTTCTGTGACTGGTGA**AGTACT**CAACCAAGTCATTCTGAGAATAGTGTATGCGGCGACCGAG  
 TTGCTCTTGGCCGGCGTCAATACGGGATAATACCGCGCCACATAGCAGAACTTTAAAAGTGCTCAT  
 CATTGAAAACGTTCTTCGGGGCGAAAACCTCTCAAGGATCTTACCGCTGTTGAGATCCAGTTCGAT  
 GTAACCCACTCGTGCACCCAAGTATCTTCAGCATCTTTTACTTTTACCAGCGTTTCTGGGTGAGC  
 AAAAAACAGGAAGGCAAAATGCCGCAAAAAAGGAATAAGGGCGACACGGAAATGTTGAATACTCAT  
 ACTCTACCTTTTTCAATATTATTGAAGCATTATCAGGGTATTGTCTCATGAGCGGATACATATT  
 TGAATGTATTTAGAAAAATAAACAAATAGGGGTTCGCGCACATTTCCCCGAAAAGTGCCACCTGA  
 CGTCTAAGAAACCATTATTATCATGACATTAACCTATAAAAAATAGGCGTATCACGAGGCCCTTTCA  
 TC

Map of the plasmid showing restriction sites, T7RNAP promoter sequence and the OriC.

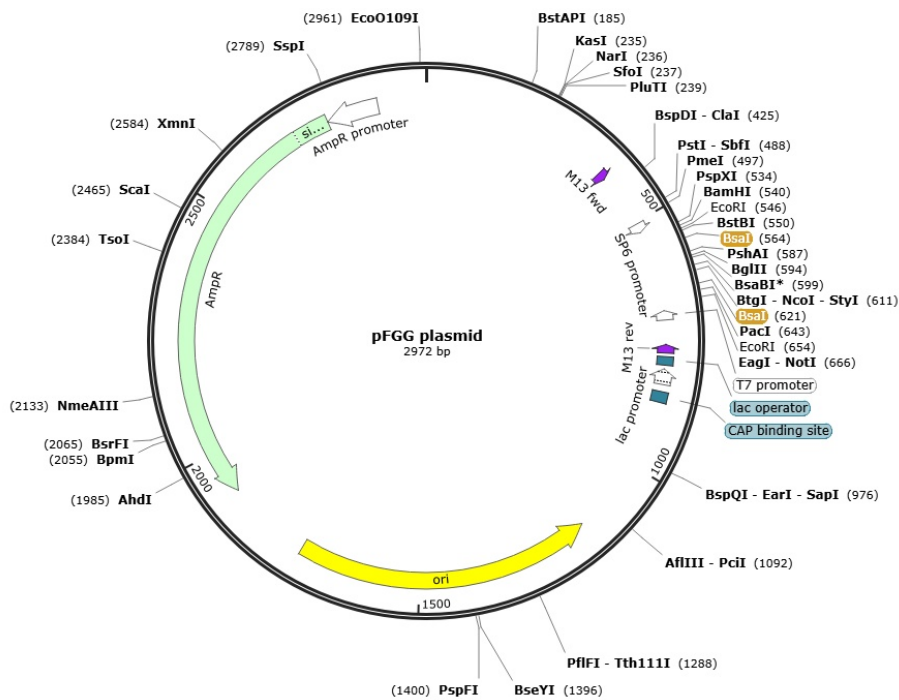

## Supplementary Table 6.

Sequence of oligonucleotides used to assemble RNA ID for characterization of transcripts originating from 4.5 kbp DNA construct. This construct has a larger separation between T7 promoter and OriC (Supplementary Table 4). This design is used for the experiments presented in Supplementary Figure 25.

Table 6

| Oligo number | Sequence (5' → 3')                        |
|--------------|-------------------------------------------|
| 1            | AGCGTGATGCTACTAATTGGGACAATTTCCAGATGAAGT   |
| 2            | ATCATCTAAGAATTTAAATGAAGAAGACTTCAGAGCTTTT  |
| 3            | GTTAAAAATTATTTGGCAAAAATAATATAATTCCGGCTGCA |
| 4            | GGGGCGGCCTCGTGATACGCCTATTTTTATAGGTTAATGT  |
| 5            | CATGATAATAATGGTTTCTTAGACGTCAGGTGGCACTTTT  |
| 6            | CGGGGAAATGTGCGCGGAACCCCTATTTGTTTATTTTTCT  |
| 7            | AAATACATTCAAATATGTATCCGCTCATGAGACAATAACC  |
| 8            | CTGATAAATGCTTCAATAATATTGAAAAAGGAAGAGTATG  |
| 9            | AGTATTCAACATTTCCGTGTCGCCCTTATTCCTTTTTTG   |
| 10           | CGGCATTTTGCCTTCCTGTTTTTAAGAAGGTTTGACCCAG  |
| 11           | AAACGCTGGGAAAGGCGGTAAAATATGCACGAAGATCAGT  |
| 12           | TCGGTTCACGAGTGGGTACATCGAACTGGATCTCAACAG   |
| 13           | CGGTAAGATCCTTGAAGAGTTTTCCGCCCCGAAGAACGTT  |
| 14           | TTCCAATGATGAGCACTTTTAAAGCTCTGCTACTGTGGCG  |
| 15           | CGGTTATATCCCGTATTGACGCCGGGCAAGAGCAACTCGG  |
| 16           | TCGCCGCATACACTATTCTCAGAATGACTTGGTTGAGTAC  |
| 17           | TCACCAGTCACAGAAAAGCATCTTACGGATGGCATGACAG  |
| 18           | TAGAGAATTATGCAGTGCTGCCATAACCATGAGTGATAAC  |
| 19           | ACTGCGGCCAACTTACTTCTGACAACGATCGGAGGACCGA  |
| 20           | AGGAGCTAACCCTTTTTTGCACAACATGGGGGATCATGT   |
| 21           | AACTCGCCTTGATCGTTGGGAACCGGAGCTGAATGAAGCC  |
| 22           | ATACCAAACGACGAGCGTGACACCACGATGCCTGTAGCAA  |
| 23           | TGGCAACAACGTTGCGCAAACATTAACGGCGAACTACT    |
| 24           | TACTCTAGCTTCCCGGCAACAATTAATAGACTGGATGGAG  |
| 25           | GCGGATAAAGTTGCAGGACCACTTCTGCGCTCGGCCCTTC  |
| 26           | CGGCTGGCTGGTTTATTGCTGATAAATCTGGAGCCGGTGA  |
| 27           | GCGTGGGTCTCGCGGTATCATTGCAGCACTGGGGCCAGAT  |
| 28           | GGTAAGCCCTCCCGTATCGTAGTTATCTACACGACGGGGA  |
| 29           | GTCAGGCAACTATGGATGAACGAAATAGACAGATCGCTGA  |
| 30           | GATAGGTGCCTCACTGATTAAGCATTGGTAACTGTCAGAC  |
| 31           | CAAGTTTACTCATATATACTTTAGATTGATTTAAAACCTTC |
| 32           | ATTTTTTAATTTAAAAGGATCTAGGTGAAGATCCTTTTTGA |
| 33           | TAATCTCATGACCAAAAATCCCTTAACGTGAGTTTTCGTTC |
| 34           | CACTGAGCGTCAGACCCCGTAGAAAAGATCAAAGGATCTT  |
| 35           | CTTGAGATCCTTTTTTTCTGCGCGTAATCTGCTGCTTGCA  |
| 36           | AACAAAAAACCACCGCTACCAGCGGTGGTTTGTTTGCCG   |

|    |                                                  |
|----|--------------------------------------------------|
| 37 | GATCAAGAGCTACCAACTCTTTTTCCGAAGGTAAGTGGCT         |
| 38 | TCAGCAGAGCGCAGATACCAAATACTGTTCTTCTAGTGTA         |
| 39 | GCCGTAGTTAGGCCACCACTTCAAGAACTCTGTAGCACCG         |
| 40 | CCTACATACCTCGCTCTGCTAATCCTGTTACCAGTGGCTG         |
| 41 | CTGCCAGTGGCGATAAGTCGTGTCTTACCGGGTTGGACTC         |
| 42 | AAGACGATAGTTACCGGATAAGGCGCAGCGGTTCGGGCTGA        |
| 43 | ACGGGGGGTTCGTGCACACAGCCCAGCTTGGAGCGAACGA         |
| 44 | CCTACACCGAACTGAGATACCTACAGCGTGAGCTATGAGA         |
| 45 | AAGCGCCACGCTTCCCGAAGGGAGAAAGGCGGACAGGTAT         |
| 46 | CCGGTAAGCGGCAGGGTCGGAACAGGAGAGCGCACGAGGG         |
| 47 | AGCTTCCAGGGGAAACGCCTGGTATCTTTATAGTCTGT           |
| 48 | CGGGTTTCGCCACCTCTGACTTGAGCGTCGATTTTTGTGA         |
| 49 | TGCTCGTCAGGGGGGCGGAGCCTATGGAAAAACGCCAGCA         |
| 50 | ACGCGGCCTTTTTACGGTTCCTGGCCTT                     |
| 51 | TTGCTGGCCTTTTTGCTCACATGTTCTTTC                   |
| 52 | CTGCGTTATCCCCTGATTCTGTGGATTTGGATATCACTCATTAGTGGT |
| 53 | TAACCGTATTACCGCCTTTGAGTGAGCTGATACCGCTCGC         |
| 54 | CGCAGCCGAACGACCGAGCGCAGCGAGTCAGTGAGCGAGG         |
| 55 | AAGCGGAAGAGCGCCCAATACGCAAACCGCCTCTCCCCGC         |
| 56 | GCGTTGGCCGATTCAATTAATGCAGCTGGCACGACAGGTTT        |
| 57 | CCCGACTGGAAGCAATTGGCAGTGAGCGCAACGCAATTA          |
| 58 | ATGTGAGTTAGCTCACTCATTAGGCACCCCAGGCTTTACA         |
| 59 | CTTTATGCTTCCGGCTCGTATAATGTGCTGATGAATCCCC         |
| 60 | TAATGATTTTGGTAAAAATCATTAAAGTTAAGGTGGATACA        |
| 61 | CATCTTGTCATATGATCAAATGGTTTCGCGAAAAATCAAT         |
| 62 | AATCAGACAACAAGATGTGCGAACTCGATATTTTACACGA         |
| 63 | CTCTCTTTACCAATTCTGCCCGAATTACACTTAAAACGA          |
| 64 | CTCAACAGCTTAACGTTGGCTTGCCACGCATTACTTGACT         |
| 65 | GTAAACTCTCACTCTTACCGAACTTGCCGTAACCTGCC           |
| 66 | AACCAAAGCGGAGAACAAAACATAACATCAAACGAAATCGAC       |
| 67 | CGATTGTTAGGTAATCGTCACCTCCACAAAGAGCGACTCG         |
| 68 | CTGTATACCGTTGGCATGCTAGCTTTATCTGTTCCGGCAA         |
| 69 | TACGATGCCATTGTACTTGTGACTGGTCTGATATTCGT           |
| 70 | GAGCAAAAACGACTTATGGTATTGCGAGCTTCAGTCGCAC         |
| 71 | TACACGGTCGTTCTGTTACTCTTTATGAGAAAGCGTTCCC         |
| 72 | GCTTTCAGAGCAATGTTCAAAGAAAGCTCATGACCAATTT         |
| 73 | CTAGCCGACCTTGCGAGCATTCTACCGAGTAACACCACAC         |
| 74 | CGCTCATTGTCAGTGATGCTGGCTTTAAAGTGCCA              |
| 75 | TGGTATAAATCCGTTGAGAAGCTGGTTTGGATATCACTCATTAGTGGT |
| 76 | GTTGGTACTGGTTAAGTCGAGTAAGAGGAAAAGTACAATA         |
| 77 | TGCAGACCTAGGAGCGGAAAAACTGGAAACCTATCAGCAA         |
| 78 | CTTACATGATATGTCATCTAGTCACTCAAAGACTTTAGGC         |
| 79 | TATAAGAGGCTGACTAAAAGCAATCCAATCTCATGCCAAA         |
| 80 | TTCTATTGTATAAATCTCGCTCTAAAGGCCGAAAAAATCA         |
| 81 | GCGCTCGACACGGACTCATTGTCACCACCCGTCACCTAAA         |
| 82 | ATCTACTCAGCGTCGGCAAAGGAGCCATGGGTTCTAGCAA         |

|     |                                                  |
|-----|--------------------------------------------------|
| 83  | CTAACTTACCTGTTGAAATTCGAACACCCAAACAACCTTGT        |
| 84  | TAATATCTATTTCGAAGCGAATGCAGATTGAAGAAACCTTC        |
| 85  | CGAGACTTGAAAAGTCCTGCCTACGGACTAGGCCTACGCC         |
| 86  | ATAGCCGAACGAGCAGCTCAGAGCGTTTTGATATCATGCT         |
| 87  | GCTAATCGCCCTGATGCTTCAACTAACATGTTGGCTTGCG         |
| 88  | GGCGTTCATGCTCAGAAACAAGGTTGGGACAAGCACTTCC         |
| 89  | AGGCTAACACAGTCAGAAATCGAAACGTACTCTCAACAGT         |
| 90  | TCGCTTAGGCATGGAAGTTTTGCGGCATTCTGGCTACACA         |
| 91  | ATAACAAGGGAAGACTTACTCGTGGCTGCAACCCTACTAG         |
| 92  | CTCAAAATTTATTCACACATGGTTACGCTTTGGGGAAATT         |
| 93  | ATGAGGGGATCTCTCAGTATAATGTGTGGAATTATGAGCG         |
| 94  | GATAATAATTTACACAGGAGGTTTAACTTTAAACATGT           |
| 95  | CAAAGAGACGTCTTTTGTTAAGAATGCTGAGGAACTTGC          |
| 96  | AAAGCAAAAAATGGATGCTATTAACCCTGAACTTTCTTCA         |
| 97  | AAATTTAAATTTTTAATAAAATTCCTGTCTCAGTT              |
| 98  | TCCTGAAGCTTGCTCTAAACCTCGTTTTGGATATCACTCATTAGTGGT |
| 99  | TCAAAAAAATGCAGAATAAAGTTGTTTGGATATCACTCATTAGTGGT  |
| 100 | GTCAAGAGGAACATATTGAATATTTAGCTCGTAGTTTTCA         |
| 101 | TGAGAGTCGATTGCCAAGAAAACCCACGCCACCTACAACG         |
| 102 | GTTCCCTGATGAGGTGGTTAGCATAGTCTTAATATAAGTT         |
| 103 | TTAATATACAGCCTGAAAATCTTGAGAGAATAAAAAGAAGA        |
| 104 | ACATCGATTTTCCATGGCAGCTGAGAATATTGTAGGAGAT         |
| 105 | CTTCTAGAAAGATTTAAGCCG                            |
| 106 | AGAATGGTCTGTGATCCCCC                             |
| 107 | CATTCCCGGCTACACTGCACCATGATCTTGCTGAAAACT          |
| 108 | CGAGCCATCCGGAAGATCTGGCGGCCGCTCTCCC               |
| 109 | CAGCAGCAGCAGCAGCAGCAGCAGCAGCAG                   |

### Supplementary Table 7.

Identified sequence within DNA construct that shows structural similarity to engineered T7RNAP transcription terminators.

Table 7

| DNA | Sequence (5' → 3')                     |
|-----|----------------------------------------|
| 1   | CAAACAAACCACCGCTGGTAGCGGTGGTTTTTTTGTTT |

### Supplementary Table 8.

The table shows the IV curves of nanopores used to study RNA IDs. The ionic current and RMS noise at 600 mV is presented for each pore. An estimate of each nanopore diameter was calculated from the ionic current values presented, assuming a conical pore geometry<sup>4</sup>.

Table 8

| Pore number | Sample                                             | Current, RMS noise at 600 mV and calculated pore diameter | Current / voltage curve (IV curve)                                                   |
|-------------|----------------------------------------------------|-----------------------------------------------------------|--------------------------------------------------------------------------------------|
| 1           | RNA IDs produced from linear DNA                   | 11.4 nA<br>6.5 pA<br>~8 nm                                | 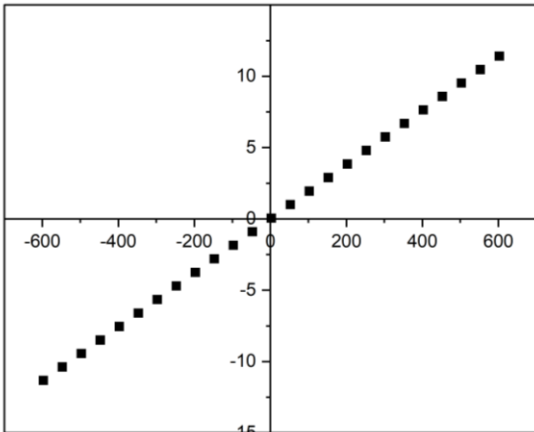  |
| 2           | RNA IDs produced from linear DNA, and DNA template | 9.9 nA<br>6.7 pA<br>~7 nm                                 |  |

3 RNA IDs  
of produced  
from circular  
template

8.7 nA  
6.2 pA  
~6 nm

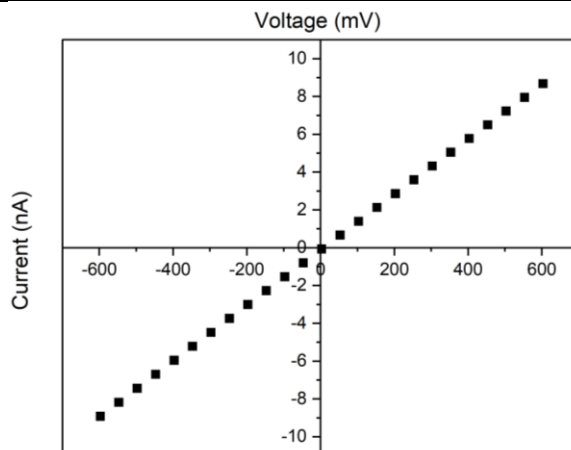

4 RNA IDs  
of produced  
from circular  
template

7.5 nA  
6.6 pA  
~5 nm

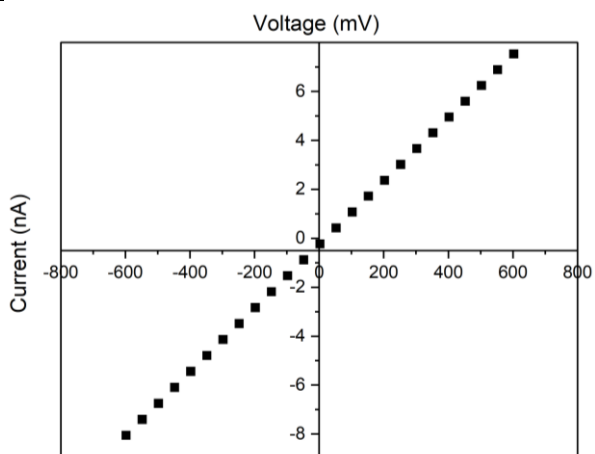

5 RNA IDs  
of produced  
from circular  
template

12.2 nA  
6.4 pA  
~9 nm

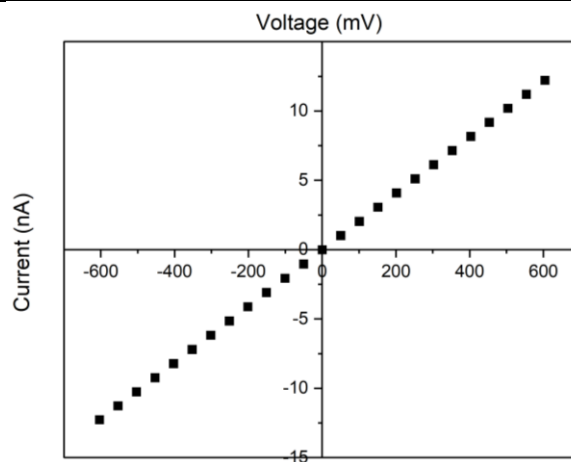



6

RNA IDs  
of produced  
from circular  
template

10.0 nA  
6.4 pA  
~7 nm

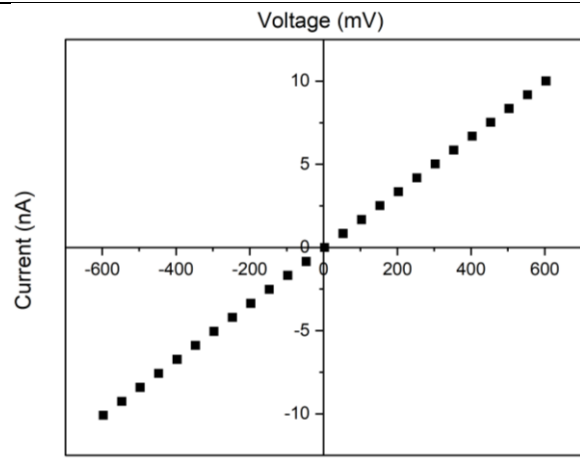

7

DNA ladder  
SF8  
(0.5 kbp –  
10 kbp)

11.1 nA  
5.7 pA  
~8 nm

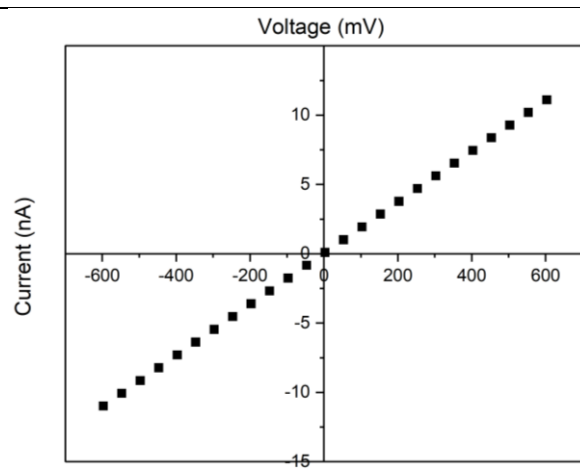

8

RNA IDs  
produced  
from 4.5 kbp  
DNA

10.9 nA  
6.4 pA  
~8 nm

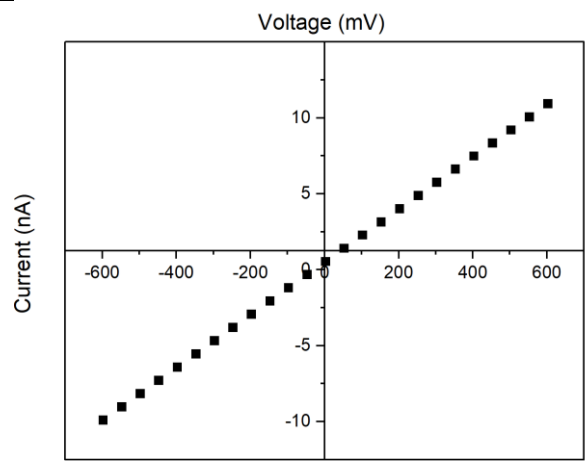

An estimate the pore's diameter was calculated from the overall resistance of the nanopore in open state,  $R$ , which is constituted by the resistance of the pore cavity region,  $R_{pore}$ , and the resistance of the access region of the pore,  $R_{acc}$ <sup>4</sup>:

$$R = R_{pore} + R_{acc}$$

This equation can be rewritten in terms of the resistivity  $\rho$  of the electrolytic solution, the pore's length,  $L$ , and the diameter of the *cis* and *trans* aperture of the pore,  $D_{cis}$  and  $D_{trans}$  :

$$R = \rho \frac{4L}{\pi D_{trans} D_{cis}} + \rho \left( \frac{1}{2 D_{trans}} + \frac{1}{2 D_{cis}} \right)$$

The diameter of the pore  $D_{cis}$  was calculated using the experimental ionic current  $I$  during the application of a 600 mV potential, assuming a  $D_{trans}$  of 200  $\mu\text{m}$ , conductivity of  $15.5 \text{ Sm}^{-1}$  for 4M LiCl, and length  $L$  of 950  $\mu\text{m}$  for our glass nanopores<sup>5,6</sup>.

## Supplementary References

1. Chen, K. et al. Dynamics of driven polymer transport through a nanopore. *Nat Phys* **17**, 1043–1049 (2021).
2. Bell, N. A. W., Muthukumar, M. & Keyser, U. F. Translocation frequency of double-stranded DNA through a solid-state nanopore. *Phys Rev E* **93**, 022401 (2016).
3. Wanunu, M., Morrison, W., Rabin, Y., Grosberg, A. Y. & Meller, A. Electrostatic focusing of unlabelled DNA into nanoscale pores using a salt gradient. *Nat Nanotechnol* **5**, 160–165 (2010).
4. Tang, W., Fried, J. P., Tilley, R. D. & Gooding, J. J. Understanding and modelling the magnitude of the change in current of nanopore sensors. *Chem Soc Rev* **51**, 5757–5776 (2022).
5. Lin, Y. et al. Characterization of DNA duplex unzipping through a sub-2 nm solid-state nanopore. *Chemical Communications* **53**, 3539–3542 (2017).
6. Bell, N. A. W. & Keyser, U. F. Digitally encoded DNA nanostructures for multiplexed, single-molecule protein sensing with nanopores. *Nat Nanotechnol* **11**, 645–651 (2016).
